1 ***Vibrio cholerae* MARTX toxin multifunctionality silences inflammatory response to**  
2 **toxin-mediated cytoskeletal collapse**

3

4 **Patrick J. Woida<sup>1</sup>, Karla J. F. Satchell<sup>1,2\*</sup>**

5 <sup>1</sup>Department of Microbiology-Immunology, Northwestern University Feinberg School of  
6 Medicine, Chicago, IL 60611, USA

7 <sup>2</sup>Corresponding author

8 \*Correspondence. Email [k-satchell@northwestern.edu](mailto:k-satchell@northwestern.edu)

9

10 **ABSTRACT**

11

12 Multifunctional autoprocessing repeats-in-toxin (MARTX) toxins are pore-forming toxins that

13 translocate multiple functionally independent effector domains into a target eukaryotic cell.

14 *Vibrio cholerae* colonizes intestinal epithelial cells (IECs) and utilizes a MARTX toxin with three

15 effector domains — the actin cross-linking domain (ACD), the Rho inactivation domain (RID),

16 and the  $\alpha/\beta$  hydrolase domain (ABH) — to regulate innate immunity and enhance colonization.

17 Whether these multiple catalytic enzymes delivered from a single toxin have coordinated

18 function has not been explored. Using cultured IECs, we demonstrate ACD-induced cytoskeletal

19 collapse activates a robust proinflammatory response that is blocked by the action of co-

20 delivered RID and ABH. Thus, MARTX toxins utilize multiple enzymatic activities on a single

21 toxin to silence the host response to both bacterial factors and effector function. Further, these

22 data explain that *V. cholerae* utilizes the MARTX toxin to suppress intestinal inflammation and

23 contribute to cholera being classically defined as non-inflammatory diarrheal disease.

24

25 **Keywords:** *Vibrio cholerae*, MARTX toxin, interleukin-8, CXCL8, RNA-seq, MAP kinases,

26 signaling

27

28

29 **GRAPHICAL ABSTRACT**

30  
31

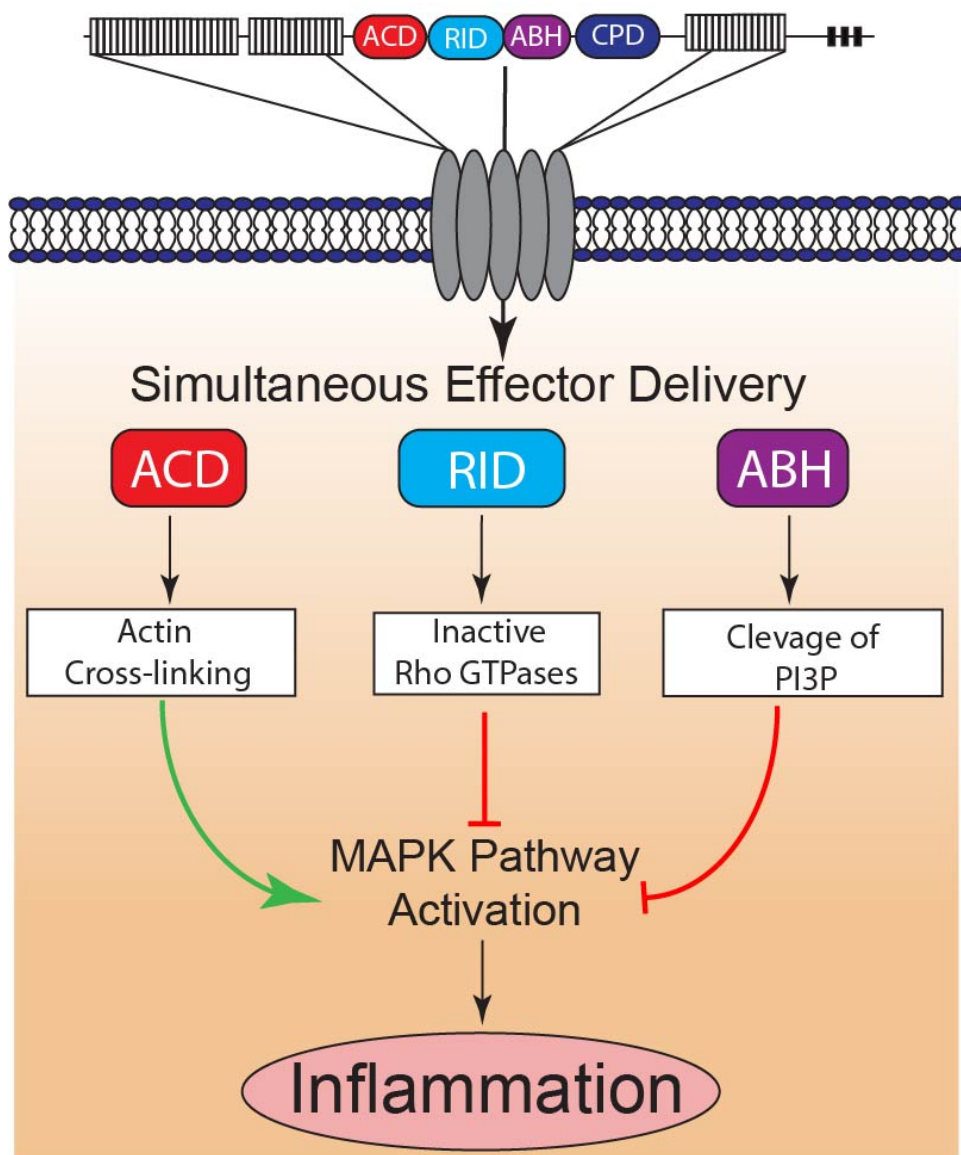

32

## 33 INTRODUCTION

34  
35 Multifunctional autoprocessing repeats-in-toxin (MARTX) toxins utilize multiple enzymatic  
36 functions to promote virulence of various *Vibrio* species. MARTX toxins are secreted as single  
37 3500 – 5300 amino acid polypeptides that contain conserved glycine-rich repeats at the N- and  
38 C-termini that flank multiple arrayed effector domains and an autoprocessing cysteine protease  
39 domain (CPD) (Satchell, 2015). The glycine-rich repeats are proposed to form a pore in the  
40 plasma membrane of eukaryotic cells to translocate the arrayed effectors and the CPD into the  
41 target cell (Dolores et al., 2015; Kim et al., 2015; Kim et al., 2008). In the cytoplasm, CPD is  
42 activated by binding host inositol hexakisphosphate (InsP<sub>6</sub>) and then auto-cleaves to free the  
43 effector domains from the large holotoxin. The individual effectors then can traffic through the  
44 cell to identify targets and to perform their catalytic functions (Egerer and Satchell, 2010;  
45 Prochazkova et al., 2009; Shen et al., 2009) (Figure 1A). Due to this enzymatic  
46 multifunctionality, MARTX toxins have been described as bacterial “cluster bombs” that release  
47 multiple cytotoxic bomblets into host cells from a single toxin warhead. While the biochemical  
48 function of many of the effector domains is known (Kim, 2018), the additive or synergistic benefit  
49 of having all these enzymatic functions delivered on a single toxin has yet to be identified  
50 (Woida and Satchell, 2018).

51 *Vibrio cholerae* is the causative agent of the severe diarrheal disease cholera (Ali et al.,  
52 2012). In addition to its primary virulence factor, the ADP-ribosylating cholera toxin, pandemic *V.*  
53 *cholerae* El Tor O1 strains secrete a 4,545 amino acid (a.a) MARTX<sub>Vc</sub> toxin that contributes to  
54 enhanced bacterial colonization of the small intestine by protecting the pathogen from  
55 neutrophil-mediated clearance during the earliest stages of infection (Olivier et al., 2007; Olivier  
56 et al., 2009; Queen and Satchell, 2012; Weill et al., 2017). The early timing of these events  
57 suggests the inhibition of neutrophils and other innate immune cells does not reflect destruction  
58 of the cells by the MARTX<sub>Vc</sub> toxin, but rather a failure of neutrophils to be recruited to the site of



59 infection. Therefore, the MARTX<sub>Vc</sub> toxin might function to limit host signaling that results in  
60 innate immune cell recruitment.

61         Although MARTX toxins can have highly variable effector domain organizations in some  
62 species, the MARTX<sub>Vc</sub> toxin of nearly all *V. cholerae* strains have the same three effector  
63 domains (Dolores and Satchell, 2013) (Figure 1A). The first effector domain is the actin cross-  
64 linking domain (ACD) that covalently cross-links monomeric actin to depolymerize actin (Fullner  
65 and Mekalanos, 2000; Kudryashov et al., 2008; Sheahan et al., 2004). The cross-linked actin  
66 oligomers also have high binding affinity for formins and other actin binding proteins to further  
67 disrupt the cytoskeleton (Heisler et al., 2015). The second domain is the Rho inactivation  
68 domain (RID) that inactivates Rac1 and other Rho family GTPases by transferring fatty acids  
69 onto lysine residues in the C-terminal polybasic region of the GTPases. The acylation of the  
70 Rho GTPases blocks them from interacting with downstream effectors. The action of both ACD  
71 and RID results in destruction of the actin cytoskeleton and loss of epithelial cell junction  
72 integrity (Dolores et al., 2015; Sheahan and Satchell, 2007; Zhou et al., 2017). The final effector  
73 domain is the  $\alpha/\beta$  hydrolase domain (ABH), a highly specific phospholipase A1 that cleaves only  
74 phosphatidylinositol 3-phosphate (PI3P) to inhibit autophagy and endocytic trafficking in HeLa  
75 cells (Agarwal et al., 2015). All three effector domains can also independently disable  
76 macrophages, suggesting a mechanism by which the MARTX<sub>Vc</sub> toxin protects against clearance  
77 of *V. cholerae* from the intestine. However, while ACD potently inhibits phagocytosis, inhibition  
78 by RID and ABH is far less robust (Dolores et al., 2015). Therefore, in the context of co-  
79 introduction into cells in parallel with ACD, phagocytosis is not likely a biologically significant  
80 outcome of RID and ABH intoxication. Further, since the MARTX<sub>Vc</sub> toxin promotes colonization  
81 possibly even well before onset of inflammation, inhibition of phagocytic clearance may not be a  
82 primary function of the MARTX<sub>Vc</sub> toxin.

83         Intestinal epithelial cells (IECs) act as a barrier to contain bacteria to the lumen, and also  
84 as sensors to detect microbial-associated molecular patterns and release chemokines that

85 recruit immune cells to the site of infection (Kagnoff and Eckmann, 1997; Peterson and Artis,  
86 2014). While *V. cholerae* is typically considered a secretory, non-inflammatory diarrheal  
87 disease, these bacteria do elicit mild inflammation in human intestines (Bishop et al., 2014;  
88 Qadri et al., 2002). In addition, *V. cholerae* is known to stimulate release of the neutrophil-  
89 recruiting chemokine interleukin-8 (IL-8 or CXCL8) from human colonic intestinal cells in  
90 response to pathogen-associated molecular patterns (PAMPs) including purified flagellin and  
91 lipopolysaccharide (LPS) (Harrison et al., 2008; Rodriguez et al., 2001; Soriani et al., 2002;  
92 Zhou et al., 2004). However, the extent to which *V. cholerae* induces IL-8 secretion *in vitro* in  
93 response to live bacteria varies dramatically based on the strain isolate (Rodriguez et al., 2001;  
94 Zhou et al., 2004). Since *V. cholerae* routinely induces inflammation in response to purified  
95 PAMPs, we hypothesized that the variable response to live bacteria may be attributed to strain-  
96 dependent variation in secreted exotoxins impacting initiation of proinflammatory signaling in  
97 IECs.

98         In this study, we show that *V. cholerae* globally suppresses proinflammatory gene  
99 expression in IECs and this signaling inhibition is mediated by the catalytic action of the  
100 secreted MARTX<sub>Vc</sub> toxin, and not by other accessory toxins. These results explain observed  
101 differences in the inflammatory response to various *V. cholerae* strains and why infections with  
102 MARTX<sub>Vc</sub><sup>+</sup> *V. cholerae* induces a highly secretory, but non-inflammatory, diarrhea. Further, we  
103 find that the cytoskeletal destruction initiated by the ACD conversely functions as a damage-  
104 associated molecular pattern (DAMP) to potently induce proinflammatory gene expression  
105 through the mitogen-activated protein kinase (MAPK) pathway; and, this response is more  
106 robust even than that induced by bacterial PAMPs. However, in the context of the MARTX<sub>Vc</sub>  
107 holotoxin, co-delivery on the same toxin of RID and ABH silences pathways that would normally  
108 transduce the signals to induce proinflammatory gene expression in response to both DAMPs  
109 and PAMPs. These data reveal that simultaneous delivery of all three effector domains on a  
110 single multifunctional toxin is advantageous as it promotes the ACD-mediated destruction of the

111 actin cytoskeleton without detection of the associated damage by the infected host. Thus,  
112 multifunctional toxins can coordinate their multiple enzymatic activities to fine-tune the host  
113 response to infection.

114

## 115 **RESULTS**

116

### 117 **The MARTX<sub>Vc</sub>, and not HlyA or HapA, inhibits IL-8 secretion from IECs**

118 *V. cholerae* secretes three accessory toxins in addition to cholera toxin: the MARTX<sub>Vc</sub> toxin  
119 encoded by the gene *rtxA*,  $\alpha$ -hemolysin encoded by *hlyA*, and hemagglutinin/protease encoded  
120 by *hapA*. To evaluate whether accessory toxins modulate IL-8 secretion in IECs, cultured IECs  
121 were treated with live *V. cholerae* strain N16961 or previously generated derivatives with  
122 deletions in *rtxA*, *hlyA*, or *hapA* (Fullner et al., 2002). N16961 stimulated IL-8 secretion at  
123 concentrations similar to untreated control cells (Figure 1B), while N16961 $\Delta$ *rtxA* induced  
124 significantly more IL-8 secretion (Figure 1B). No difference was observed due to loss of HlyA or  
125 HapA, or both toxins ( $\Delta$ *hlyA* $\Delta$ *hapA*, heretofore referred to as KfV119) (Figure 1B). These results  
126 reveal that N16961 has the potential to stimulate release of IL-8 from IECs, but the MARTX<sub>Vc</sub>  
127 toxin actively suppresses the response.

128 The atypical El Tor O1 strain 2010EL-1786 from the 2010 Haiti outbreak is known to be  
129 more proinflammatory (Satchell et al., 2016). This strain has a premature stop codon in *rtxA* that  
130 prevents secretion of the MARTX<sub>Vc</sub> toxin (Dolores and Satchell, 2013). Consistent with results  
131 using N16961, 2010EL-1786 induced a significant increase in IL-8 secretion from IECs, but this  
132 response was suppressed when the stop codon in *rtxA* was restored to a Trp codon (Figure  
133 1C). These results show that *V. cholerae* activates proinflammatory chemokine secretion, but  
134 this is suppressed in *rtxA*<sup>+</sup> *V. cholerae* strains.

135

136 **MARTX<sub>Vc</sub> toxin effector domains, and not the pore, inhibit IL-8 secretion in IECs**

137 The MARTX<sub>Vc</sub> toxin has four putative cytotoxic functions, the formation of a pore and the  
138 biochemical activities of its three effector domains (Woida and Satchell, 2018). In previous  
139 studies (Dolores et al., 2015), a derivative of KJV119 was generated in which the *rtxA* gene was  
140 modified to replace sequences that encode the effector domains with an in-frame sequence for  
141  $\beta$ -lactamase (*Bla*). This strain produces a toxin that forms a functional pore and is able to  
142 translocate, but lacks all effector activity (*rtxA::bla*). The individual effector domains ACD  
143 (*acd::bla*), RID (*rid::bla*), and ABH (*abh::bla*) were then individually restored into the parent  
144 *rtxA::bla* strain to create effector gain of function toxins (Figure 2A-E). Catalytically inactive  
145 effector derivatives of these toxins and a  $\Delta$ *rtx* negative control strain were also generated and  
146 characterized.

147 The *rtxA::bla* strain induced similar levels of IL-8 secretion from intestinal cells as the  
148  $\Delta$ *rtx* strain, but significantly higher than KJV119 (Figure 2F). This result indicates that the  
149 MARTX<sub>Vc</sub> pore alone does not suppress IL-8 secretion. Surprisingly, the *acd::bla* strain induced  
150 significantly more IL-8 secretion compared to both the  $\Delta$ *rtx* and *rtxA::bla* strains (Figure 2F). The  
151 *rid::bla* strain induced IL-8 secretion equivalent to KJV119 (Figure 2F). These results indicate  
152 that RID is sufficient to suppress *V. cholerae*-induced IL-8 secretion, while ACD actually  
153 exacerbates IL-8 secretion beyond stimulation by live bacteria. The *abh::bla* strain had no effect  
154 on *V. cholerae*-induced IL-8 secretion (Figure 2F). In fact, when intestinal cells were  
155 simultaneously co-inoculated with both the *acd::bla* and the *rid::bla* strains, IL-8 secretion was  
156 also suppressed (Figure 2G). This was due to the acylation activity of RID, since the *rid*-  
157 H2782A::*bla* catalytically inactive strain did not suppress IL-8. In addition, although less robust,  
158 co-inoculation of *acd::bla* with *abh::bla* also attenuated IL-8 secretion (Figure 2G). These results  
159 reveal that RID, and to a lesser extent ABH, inhibits both bacterial- and ACD-induced IL-8  
160 secretion.

161

162 **The MARTX<sub>Vc</sub> toxin inhibits expression of the CXCL8 gene**

163 A block to IL-8 secretion can occur by inhibition of IL-8 protein secretion or inhibition of  
164 IL-8 (*CXCL8*) gene expression. At two hours post-inoculation, there was no significant change in  
165 transcription of the *CXCL8* gene in intestinal cells inoculated with KfV119 or  $\Delta$ rtx compared to  
166 mock-treated cells (Figure 2H). There was also no significant change due to RID or ABH. By  
167 contrast, a significant 32-fold increase was induced by ACD (Figure 2H). These results indicate  
168 that MARTX<sub>Vc</sub> effector domain modulation of IL-8 secretion occurred primarily due to blocking of  
169 *CXCL8* gene transcription.

170 The absence of a response to  $\Delta$ rtx was unexpected since *V. cholerae* alone induced IL-8  
171 secretion (Figure 1B, 2F) (Zhou et al., 2004). Since chemokine secretion from cells by ELISA  
172 requires a long incubation period following bacterial challenge, we hypothesized that the IEC  
173 response to *V. cholerae* occurs after the 120 minutes (min) bacterial challenge in which *CXCL8*  
174 expression was assayed. Therefore, changes in *CXCL8* expression were measured overtime  
175 following bacterial challenge. Confirming previous results, no change in *CXCL8* expression was  
176 observed by KfV119 at any timepoint measured (Figure 2I). However, while  $\Delta$ rtx did not induce  
177 changes in expression at 120 min post-inoculation, there was a significant 10-fold increase in  
178 expression at six hours post-inoculation that eventually returned to baseline between 12 and 22  
179 hours (Figure 2I). As observed previously, *acd::bla* induced a significant 42-fold change in  
180 *CXCL8* expression at two hours. While this response diminished overtime, *CXCL8* mRNA levels  
181 remained 10- to 18-fold higher than mock-treated cells (Figure 2I). These data further show that  
182 ACD-mediated *CXCL8* expression is stimulated as much as four hours before *V. cholerae*-  
183 induced gene expression. Therefore, in addition to suppressing the host response to effector  
184 activity, *V. cholerae* may utilize the MARTX<sub>Vc</sub> toxin to disable host inflammatory responses prior

185 to detection of bacterial PAMPs, such as flagellin and LPS (Harrison et al., 2008; Soriani et al.,  
186 2002).

187

### 188 **ACD, but not the MARTX<sub>Vc</sub> holotoxin, induces proinflammatory gene expression in IECs**

189 To determine the breadth of the proinflammatory immune response stimulated by ACD, we  
190 utilized a whole transcriptome RNA-sequencing (RNA-seq) approach. Cells were treated with  
191 various bacterial strains for two hours prior to transcriptional profiling. Statistically significant  
192 results were given a  $-1 \leq \log_2 \leq 1$  fold change cut off to adjust for biologically significant  
193 changes (Figure 3A-B). A single gene *JUN* was upregulated by KfV119 compared to  
194 uninoculated cells, but this upregulation was not consistent when validated by qPCR (Figure  
195 3C). Thus, there was no significant upregulation of any host gene after two hours treatment of  
196 IECs with MARTX<sub>Vc</sub>+ *V. cholerae*.

197 Similarly, *rid::bla*, *abh::bla*, and  $\Delta$ *rtx* also did not induce significant changes in IEC gene  
198 expression by two hours. By contrast, the *acd::bla* strain induced differential regulation of over  
199 200 genes. Many of the significantly upregulated genes by ACD were identified as regulators of  
200 inflammation. These include genes for chemokines CXCL8 (IL-8) and CXCL3 (IL-3), cytokine  
201 TNF, and for proinflammatory transcription factors JUN, FOS, and EGR1/2/3 (Fig 3B-G).

202 Upregulation of select proinflammatory genes was validated by qPCR (Figure 2H, 3C-G). These  
203 data suggest that when delivered independently, ACD induces proinflammatory gene  
204 expression more rapidly than by *V. cholerae* alone. However, when ACD is delivered on the  
205 complete MARTX<sub>Vc</sub> toxin, the response is abolished.

206

### 207 **RID and ABH suppress host MAPK signaling to modulate the ACD proinflammatory** 208 **response**

209 Bioinformatic analysis of the *acd::bla* differentially regulated genes revealed that many  
210 were associated with the ERK, p38, JNK MAPK and NF- $\kappa$ B pathways (Figure 3H). These  
211 pathways have also been associated with induction of IL-8 by purified *V. cholerae* flagellin  
212 (Harrison et al., 2008). The phosphorylation of MAPK in bacterial-treated cells was monitored  
213 after two hours. While KfV119-treated cells showed no ERK phosphorylation,  $\Delta$ *rtx* activated  
214 ERK signaling (Figure 3I). Further, *acd::bla* stimulated phospho-ERK levels above that of  $\Delta$ *rtx*  
215 alone (Figure 3I). Both the *rid::bla* and *abh::bla* strains suppressed phospho-ERK, while *rid*-  
216 *H2782A::bla* and *abh-H3369A::bla* strains did not (Figure 3I). KfV119-treated cells also showed  
217 no phosphorylation of p38 or JNK. However, these MAPK pathways were activated by *acd::bla*  
218 (Figure 3J and K). While previous studies suggest *V. cholerae* PAMPs may also activate these  
219 pathways (Harrison et al., 2008), the observed limited or undetectable p38 and JNK MAPK  
220 phosphorylation by  $\Delta$ *rtx* alone is likely a result of timing, since *V. cholerae* does not induce  
221 expression of proinflammatory genes until six hours post-inoculation (Figure 2I and 3A). Finally,  
222 none of the effector domains inhibited NF- $\kappa$ B, as measured by I $\kappa$ B $\alpha$  degradation (Figure 3L).

223 The lack of MAPK activation in MARTX<sub>Vc</sub><sup>+</sup> KfV119-treated cells suggests there is active  
224 suppression of ACD-induced MAPK signaling due to interplay between the MARTX<sub>Vc</sub> effector  
225 domains. However, these experiments rely on comparing strains with only one effector to those  
226 with either all or no effectors. To study interactions between effector domains requires MARTX<sub>Vc</sub>  
227 toxin strains that simultaneously deliver two active effectors into a cell on a single toxin. Six new  
228 strains with introduced codon changes in *rtxA* were generated to produce MARTX<sub>Vc</sub> toxins that  
229 retain natural processing and delivery of all effectors, but with one, two, or all three of the  
230 effectors carrying point mutations in essential catalytic site residues (Figure 4A and Figure S1).

231 Cells treated with these strains confirmed results above that ACD-induced IL-8 secretion is  
232 suppressed by both RID and ABH (Figure 4B). However, unlike *abh::bla*, the ABH Active Only



233 strain also significantly reduced bacterial secretion of IL-8 (Figure 4B). Therefore, when  
234 delivered on the complete holotoxin, ABH can suppress *V. cholerae* induction of IL-8.

235 To determine if both RID and ABH can suppress ACD upregulation of MAPK signaling,  
236 activation of these pathways were examined in cells treated with the newly constructed strains.  
237 The single active ACD strain stimulated ERK activation beyond that of *V. cholerae* alone, while  
238 both the single active RID and ABH strains suppressed bacterial activation of ERK (Figure 4C).  
239 Additionally, both the Active ACD/RID and Active ACD/ABH strain showed attenuation of ACD-  
240 induced phospho-ERK, phospho-JNK and phospho-p38 compared to the ACD Active only strain  
241 (Figure 4C-E).

242 Further, cells treated with PD98059, an inhibitor of ERK, showed no attenuation of the  
243 IL-8 response (Figure 4F). However, inhibition of the p38 MAPK pathway by SB202190 did  
244 inhibit IL-8 secretion (Figure 4G), while inhibition of the JNK pathway by SP600125 had no  
245 effect on IL-8 secretion (Figure 4H).

246 In total, these data show that suppression of MAPK signaling pathways, particularly the  
247 p38 pathway, can modulate the ACD-induced proinflammatory response, and this response is  
248 attenuated by the action of RID and ABH.

249

250 **Cytoskeletal collapse can activate proinflammatory signaling in ACD-treated cells, but**  
251 **the signaling is not detected due to prior action of RID and ABH**

252 ACD has two putative cytotoxic functions. The first is the inhibitor action of toxic actin oligomers  
253 (dimers and trimers) formed when only 2-4% of total actin has been cross-linked (Heisler et al.,  
254 2015; Kudryashova et al., 2018). The second is ACD will eventually cross-link nearly 100% of  
255 cellular actin into higher order oligomers (10 to 15-mers) to sequester bulk actin and induce  
256 cytoskeletal collapse (Fullner and Mekalanos, 2000). Kinetic experiments comparing actin  
257 cross-linking abundance to MAPK activation were performed to determine which of these  
258 functions activate MAPK signaling. The ACD Active Only strain induced a maximum of 4% of



259 total actin cross-linked between 5 and 15 min after addition of *V. cholerae*, corresponding to the  
260 formation of early toxic actin oligomers (Figures 5A-B and S2). Cross-linking increased around  
261 60 min (Figure 5A-B) corresponded to ACD sequestering bulk actin to induce actin  
262 depolymerization and cytoskeletal collapse. In the same assayed samples, MAPK signaling was  
263 activated between 60 and 90 min (Figure 5C-H), when over 50% total monomeric actin was  
264 cross-linked. These results indicate that a significant portion of actin needs to be cross-linked to  
265 activate proinflammatory signaling. While the Triple\* strain showed stochastic activation of  
266 MAPK signaling between 5 and 15 min, it induced significantly less ERK phosphorylation than  
267 the ACD Active Only strain and there was no detection of phospho-p38 or phospho-JNK  
268 between 30 and 120 min (Figure S3C-H). These data suggest that it is ACD sequestration of  
269 bulk actin and cytoskeletal destruction that leads to activation of proinflammatory signaling in  
270 IECs.

271 To completely block the intestinal inflammatory response, RID and ABH would have to  
272 inactivate MAPK signaling prior to host detection of ACD-induced cytoskeletal collapse. This  
273 would indicate that instead of reversing the activation state of MAPK pathways after 60-90 min,  
274 RID and ABH inactivate these pathways ahead of ACD-induced activation. Cells treated with  
275 KfV119 failed to induce any changes in MAPK activation following significant actin cross-linking  
276 (Figure 6A-F). Further, both the ACD/RID Active strain and the ACD/ABH Active strain showed  
277 reduced phosphorylation of ERK, p38, and JNK, even following significant actin cross-linking at  
278 60 min (Figure S4A-L). Additionally, MAPK activation induced by the Active ACD/RID and Active  
279 ACD/ABH strains was still significantly less than activation by the ACD Active only strain at 120  
280 min (Figure 6D-F). These data would suggest that RID and ABH are each sufficient to attenuate  
281 ACD induction of MAPK signaling. However, modest, yet significant, activation of the JNK  
282 pathway by the Active ACD/RID strain was still observed at 120 min (Figure S4A-F). The Active  
283 ACD/ABH strain also induced slight, yet significant, activation of the p38 and JNK pathways at  
284 120 min (Figure S4G-L). Since both RID and ABH alone do not completely abolish activation of

285 these pathways, both effectors may be required to completely abolish the global inflammatory  
286 response observed in the RNA-seq analysis (Figure 3A). The inhibition of MAPK signaling was  
287 not due to RID and ABH directly inhibiting ACD actin cross-linking activity. In fact, the ACD/ABH  
288 strain showed slight, yet significant, increase in actin cross-linking at 30 and 60 min before  
289 returning to similar abundances at 90 and 120 min (Figure S4M). Therefore, both RID and ABH  
290 independently silence signal transduction pathways prior to host detection of ACD induced  
291 collapse of the actin cytoskeleton without modulating ACD activity.

292

293 **RID can inhibit IL-8 secretion due to actin destruction by ACD and by latrunculin A,**  
294 **independent of live bacteria or formin inhibition.**

295 To determine if the action of RID is specific to MARTX toxins or more broadly applicable,  
296 cells were treated with purified recombinant ACD fused to the N-terminal of the anthrax lethal  
297 toxin (LF<sub>N</sub>ACD) in combination with the anthrax protective antigen (PA). This previously  
298 characterized system allows for the delivery of MARTX effector domains into cells in the  
299 absence of bacteria and MARTX toxin delivery (Figure 7A) (Cordero et al., 2006). Only cells  
300 treated with LF<sub>N</sub>ACD and PA induced IL-8 secretion, demonstrating that ACD is sufficient for  
301 induction of a proinflammatory immune response in the absence of a bacterium. This response  
302 was inhibited by co-treating cells with both LF<sub>N</sub>ACD and LF<sub>N</sub>RID in the presence of PA (Figure  
303 7B). Chemical depolymerization of actin also can induce IL-8 secretion (Bobo et al., 2013).  
304 Indeed, cells treated with latrunculin A, a sponge toxin that binds and sequesters G-actin, also  
305 showed IL-8 secretion. Showing that the mechanisms are conserved, treatment of cells with  
306 LF<sub>N</sub>RID in the presence of PA suppressed latrunculin A induced IL-8 secretion (Figure 7C).  
307 However, inhibiting formins with SMIFH2 failed to elicit an IL-8 response (Figure 7D). These  
308 data support that cytoskeletal collapse stimulates the inflammatory pathways and, regardless of  
309 the inducer, these pathways are inhibited by RID.

310

311 **DISCUSSION**

312

313 MARTX toxins are unique hybrids of independently secreted toxins and multifunctional effector  
314 delivery systems (Gavin and Satchell, 2015; Kim, 2018). This study demonstrates that the *V.*  
315 *cholerae* MARTX toxin utilizes this multifunctionality to “self-regulate” and silence the host  
316 response both to its own cytotoxic activity and detection of bacterial PAMPs. Following  
317 translocation, ACD begins cross-linking actin to produce early toxic oligomers that sequester  
318 actin binding proteins and disrupt intestinal tight junctions. While these toxic oligomers are being  
319 formed, RID and ABH block MAPK signaling. Once ACD begins to sequester bulk actin to  
320 induce cytoskeletal collapse, the cell is unable to trigger MAPK activation. Therefore, the  
321 MARTX<sub>Vc</sub> toxin blocks IECs from activating an innate immune response (Figure 7E). While  
322 previous studies have suggested MARTX<sup>+</sup> *V. cholerae* strains induce IL-8 secretion, those  
323 studies found this proinflammatory response to be growth phase dependent in which stationary  
324 phase cultures contain more IL-8 than log phase cultures (Zhou et al., 2004). Secretion of the  
325 MARTX<sub>Vc</sub> toxin is also growth phase dependent and is expressed and secreted during log  
326 phase and then toxin present in the supernatant fluids is degraded by proteases during  
327 stationary phase (Boardman et al., 2007). Therefore, no toxin would be present to suppress IL-8  
328 secretion. Our findings support a new model in which MARTX<sub>Vc</sub> toxin produced during the early  
329 active growth stage in the intestines acts to suppress the IEC inflammatory response. These  
330 data indicate that MARTX<sub>Vc</sub> toxin suppression of intestinal innate immunity prevents host  
331 recruitment of immune cells to protect the bacteria from neutrophil-mediated clearance.  
332 Additionally, MARTX<sub>Vc</sub> toxin immunomodulatory activities may contribute to the differences in  
333 inflammation observed between various *V. cholerae* strains (Rodriguez et al., 2001; Zhou et al.,  
334 2004).

335 The current predominant circulating *V. cholerae* strains responsible for disease are  
336 altered El Tor isolate that are hypervirulent and exhibit increased clinical severity of diarrhea

337 (Alam et al., 2011; Son et al., 2011). This is in part due to the acquisition of mutations in H-NS  
338 and VieA resulting in increased production of cholera toxin and HlyA, increased motility, and  
339 inflammasome activation suggesting increased inflammation (Russell et al., 2018; Satchell et  
340 al., 2016; Son et al., 2011). In addition, these strains naturally lack the MARTX<sub>Vc</sub> toxin due to a  
341 stop codon in *rtxA*. Restoring toxin secretion in altered El Tor isolate 2010EL-1786 attenuated  
342 IL-8 induction comparable to the parent strain (Figure 1C). Thus, loss of the MARTX<sub>Vc</sub> toxin  
343 immunomodulatory activities in these altered strains may increase intestinal inflammation, which  
344 could exacerbate disease severity and contribute to its hypervirulence.

345         The effector domains, and not the MARTX<sub>Vc</sub> pore, were identified to modulate innate  
346 immune signaling in IECs (Figure 2, 4). These data support a previously established model in  
347 which the MARTX pore functions primarily as an effector delivery platform and not a direct  
348 virulence mechanism (Gavin et al., 2017). How each delivered effector contributes to  
349 pathogenesis is still debated. While other studies have connected RID and ABH to inhibition of  
350 macrophage phagocytosis *in vitro* (Chen et al., 2017; Zhou et al., 2017), these conclusions  
351 contradicted previous findings that 5% inhibition by these effectors is biologically insignificant  
352 compared to the 90% inhibition by ACD (Dolores et al., 2015). Our study validates that RID and  
353 ABH most likely function primarily to abolish host detection of cytoskeletal damage and bacterial  
354 PAMPs. RID-mediated inactivation of MAPK pathways most likely occurs through its direct  
355 inactivation of Rho family GTPases. Rho GTPases regulate MAPK and other cell signaling  
356 pathways and bacterial toxin inactivation of Rho GTPase can inhibit these pathways in specific  
357 cell types (Schwartz, 2004; Woolery et al., 2014). However, toxin inactivation of Rho GTPases  
358 through covalent modifications, such as acylation or glycosylation, induces IL-8 secretion in  
359 IECs and activates the pyrin inflammasome in macrophages (Mahida et al., 1996; Xu et al.,  
360 2014). However, RID does not activate the inflammasome (Xu et al., 2014). Therefore, RID  
361 acylation of the C-terminal polybasic region of Rho family GTPases allows for the inactivation of

362 Rho GTPases to suppress proinflammatory signaling pathways in IECs, while also evading host  
363 detection of Rho inactivation through the inflammasome.

364 How cleavage of PI3P by ABH blocks proinflammatory pathways is still unknown. PI3P  
365 is required for the formation of autophagosomes and ABH-mediated cleavage of PI3P inhibits  
366 formation of autophagosomes and endocytic trafficking (Agarwal et al., 2015). We postulate that  
367 ABH depletion of PI3P could block formation of scaffolding complexes on autophagosomes and  
368 endosomes that promote recruitment and activation of MAPK signaling molecules  
369 (Fehrenbacher et al., 2009; Martinez-Lopez et al., 2013). The loss of the scaffolds would then  
370 prevent activation of the MAPK pathway.

371 ACD production of toxic actin oligomers was recently characterized as the primary  
372 cytotoxic mechanism of ACD based on the hypothesis that the kinetics of ACD actin cross-  
373 linking prevent it from cross-linking the majority of cellular actin (Heisler et al., 2015). Our study  
374 reveals ACD stimulation of MAPK signaling pathways occur following cross-linking of over 50%  
375 of cellular actin (Figure 6, 7). This supports previous findings in which type VI secreted ACD  
376 cross-links significant quantities of actin and induce intestinal inflammation mice (Ma and  
377 Mekalanos, 2010). While the toxic oligomers may still contribute to cytoskeletal collapse, our  
378 data indicate that it is the destruction of the cytoskeleton, and not the direct formation of toxic  
379 actin oligomers inhibition of formins, that activate proinflammatory signaling.

380 RID and ABH silencing the global response to ACD activity provide evidence that  
381 different MARTX effector domain combinations could impact the overall host response to co-  
382 delivered effectors. These data suggest that an effector's contribution to virulence and disease  
383 could be enhanced or attenuated depending on which other effector domains it is delivered with.  
384 *V. vulnificus* with different natural effector combinations have varying virulence potential and  
385 promote altered host responses (Gavin and Satchell, 2018; Kwak et al., 2011; Murciano et al.,  
386 2017). Therefore, MARTX toxin multifunctionality, in combination with variability in the effector

387 domain repertoire, allows for variety of effector interplay combinations which could either  
388 enhance or attenuate MARTX toxin associated virulence.

389

### 390 **ACKNOWLEDGEMENTS**

391 We would like to thank the Northwestern University Center for Genetic Medicine NUSeq core  
392 facility, especially Xinkun Wang and Matthew Schipma, for technical assistance, bioinformatic  
393 analysis of the RNA-sequencing experiments and DNA sequencing. We would like to thank  
394 members of the Satchell lab for their valuable input and technical support and Dr. Nicholas  
395 Cianciotto and Dr. Gail Hecht for review of the manuscript. This work was supported by the NIH  
396 Ruth L. Kirschstein Institutional National Research Service Award Training Grant in Immunology  
397 and Microbial Pathogenesis T32AI007476 (to P.J.W.) and NIH grants R01AI092825 and  
398 R01AI098369 (to K.J.F.S.).

399

### 400 **AUTHOR CONTRIBUTIONS**

401 P.J.W. conceptualized, designed, and conducted all experiments. K.J.F.S advised on all  
402 experiments. P.J.W. wrote the original draft of the manuscript and both P.J.W. and K.J.F.S.  
403 reviewed and edited the manuscript.

404

### 405 **CONFLICT OF INTEREST**

406 The authors declare no conflict of interest.

407

### 408 **REFERENCES**

409 Agarwal, S., Kim, H., Chan, R.B., Agarwal, S., Williamson, R., Cho, W., Paolo, G.D., and  
410 Satchell, K.J. (2015). Autophagy and endosomal trafficking inhibition by *Vibrio cholerae* MARTX  
411 toxin phosphatidylinositol-3-phosphate-specific phospholipase A1 activity. Nat Commun. 6,  
412 8745.

413 Ahrens, S., Geissler, B., and Satchell, K.J. (2013). Identification of a His-Asp-Cys catalytic triad  
414 essential for function of the Rho inactivation domain (RID) of *Vibrio cholerae* MARTX toxin. J  
415 Biol Chem. 288, 1397-1408.

416 Alam, M., Islam, A., Bhuiyan, N.A., Rahim, N., Hossain, A., Khan, G.Y., Ahmed, D., Watanabe,  
417 H., Izumiya, H., Faruque, A.S., et al. (2011). Clonal transmission, dual peak, and off-season  
418 cholera in Bangladesh. Infect Ecol Epidemiol. 1.

419 Ali, M., Lopez, A.L., You, Y.A., Kim, Y.E., Sah, B., Maskery, B., and Clemens, J. (2012). The  
420 global burden of cholera. Bull World Health Organ. 90, 209-218A.

421 Anders, S., Pyl, P.T., and Huber, W. (2015). HTSeq--a Python framework to work with high-  
422 throughput sequencing data. Bioinformatics. 31, 166-169.

423 Bishop, A.L., Patimalla, B., and Camilli, A. (2014). *Vibrio cholerae*-induced inflammation in the  
424 neonatal mouse cholera model. Infect Immun. 82, 2434-2447.

425 Boardman, B.K., Meehan, B.M., and Fullner Satchell, K.J. (2007). Growth phase regulation of  
426 *Vibrio cholerae* RTX toxin export. J Bacteriol. 189, 1827-1835.

427 Bobo, L.D., El Feghaly, R.E., Chen, Y.S., Dubberke, E.R., Han, Z., Baker, A.H., Li, J., Burnham,  
428 C.A., and Haslam, D.B. (2013). MAPK-activated protein kinase 2 contributes to *Clostridium*  
429 *difficile*-associated inflammation. Infect Immun. 81, 713-722.

430 Carmona-Saez, P., Chagoyen, M., Tirado, F., Carazo, J.M., and Pascual-Montano, A. (2007).  
431 GENECODIS: a web-based tool for finding significant concurrent annotations in gene lists.  
432 Genome Biol. 8, R3.

433 Chen, C.L., Chien, S.C., Leu, T.H., Harn, H.I., Tang, M.J., and Hor, L.I. (2017). *Vibrio vulnificus*  
434 MARTX cytotoxin causes inactivation of phagocytosis-related signaling molecules in  
435 macrophages. J Biomed Sci. 24, 58.

436 Cordero, C.L., Kudryashov, D.S., Reisler, E., and Satchell, K.J. (2006). The Actin cross-linking  
437 domain of the *Vibrio cholerae* RTX toxin directly catalyzes the covalent cross-linking of actin. J  
438 Biol Chem. 281, 32366-32374.



439 Dobin, A., Davis, C.A., Schlesinger, F., Drenkow, J., Zaleski, C., Jha, S., Batut, P., Chaisson,  
440 M., and Gingeras, T.R. (2013). STAR: ultrafast universal RNA-seq aligner. *Bioinformatics*. 29,  
441 15-21.

442 Dolores, J., and Satchell, K.J. (2013). Analysis of *Vibrio cholerae* genome sequences reveals  
443 unique rtxA variants in environmental strains and an rtxA-null mutation in recent altered El Tor  
444 isolates. *MBio*. 4, e00624.

445 Dolores, J.S., Agarwal, S., Egerer, M., and Satchell, K.J. (2015). *Vibrio cholerae* MARTX toxin  
446 heterologous translocation of beta-lactamase and roles of individual effector domains on  
447 cytoskeleton dynamics. *Mol Microbiol*. 95, 590-604.

448 Egerer, M., and Satchell, K.J. (2010). Inositol hexakisphosphate-induced autoprocessing of  
449 large bacterial protein toxins. *PLoS Pathog*. 6, e1000942.

450 Fehrenbacher, N., Bar-Sagi, D., and Philips, M. (2009). Ras/MAPK signaling from  
451 endomembranes. *Mol Oncol*. 3, 297-307.

452 Fullner, K.J., Boucher, J.C., Hanes, M.A., Haines, G.K., 3rd, Meehan, B.M., Walchle, C.,  
453 Sansonetti, P.J., and Mekalanos, J.J. (2002). The contribution of accessory toxins of *Vibrio*  
454 *cholerae* O1 El Tor to the proinflammatory response in a murine pulmonary cholera model. *J*  
455 *Exp Med*. 195, 1455-1462.

456 Fullner, K.J., and Mekalanos, J.J. (1999). Genetic characterization of a new type IV-A pilus  
457 gene cluster found in both classical and El Tor biotypes of *Vibrio cholerae*. *Infect Immun*. 67,  
458 1393-1404.

459 Fullner, K.J., and Mekalanos, J.J. (2000). In vivo covalent cross-linking of cellular actin by the  
460 *Vibrio cholerae* RTX toxin. *EMBO J*. 19, 5315-5323.

461 Gavin, H.E., Beubier, N.T., and Satchell, K.J. (2017). The Effector Domain Region of the *Vibrio*  
462 *vulnificus* MARTX Toxin Confers Biphasic Epithelial Barrier Disruption and Is Essential for  
463 Systemic Spread from the Intestine. *PLoS Pathog*. 13, e1006119.



- 464 Gavin, H.E., and Satchell, K.J. (2015). MARTX toxins as effector delivery platforms. *Pathog Dis.*  
465 73, ftv092.
- 466 Gavin, H.E., and Satchell, K.J.F. (2018). RRSP and RID Effector Domains Dominate Virulence  
467 Impact of *Vibrio vulnificus* MARTX Toxin. *J Infect Dis.* jiy590.
- 468 Harrison, L.M., Rallabhandi, P., Michalski, J., Zhou, X., Steyert, S.R., Vogel, S.N., and Kaper,  
469 J.B. (2008). *Vibrio cholerae* flagellins induce Toll-like receptor 5-mediated interleukin-8  
470 production through mitogen-activated protein kinase and NF-kappaB activation. *Infect Immun.*  
471 76, 5524-5534.
- 472 Heisler, D.B., Kudryashova, E., Grinevich, D.O., Suarez, C., Winkelman, J.D., Birukov, K.G.,  
473 Kotha, S.R., Parinandi, N.L., Vavylonis, D., Kovar, D.R., et al. (2015). ACD toxin-produced actin  
474 oligomers poison formin-controlled actin polymerization. *Science.* 349, 535-539.
- 475 Kagnoff, M.F., and Eckmann, L. (1997). Epithelial cells as sensors for microbial infection. *J Clin*  
476 *Invest.* 100, 6-10.
- 477 Kim, B.S. (2018). The Modes of Action of MARTX Toxin Effector Domains. *Toxins (Basel).* 10.
- 478 Kim, B.S., Gavin, H.E., and Satchell, K.J. (2015). Distinct roles of the repeat-containing regions  
479 and effector domains of the *Vibrio vulnificus* multifunctional-autoprocessing repeats-in-toxin  
480 (MARTX) toxin. *MBio.* 6, e00324.
- 481 Kim, Y.R., Lee, S.E., Kook, H., Yeom, J.A., Na, H.S., Kim, S.Y., Chung, S.S., Choy, H.E., and  
482 Rhee, J.H. (2008). *Vibrio vulnificus* RTX toxin kills host cells only after contact of the bacteria  
483 with host cells. *Cell Microbiol.* 10, 848-862.
- 484 Kudryashov, D.S., Cordero, C.L., Reisler, E., and Satchell, K.J. (2008). Characterization of the  
485 enzymatic activity of the actin cross-linking domain from the *Vibrio cholerae* MARTX<sub>Vc</sub> toxin. *J*  
486 *Biol Chem.* 283, 445-452.
- 487 Kudryashova, E., Heisler, D.B., Williams, B., Harker, A.J., Shafer, K., Quinlan, M.E., Kovar,  
488 D.R., Vavylonis, D., and Kudryashov, D.S. (2018). Actin Cross-Linking Toxin Is a Universal

489 Inhibitor of Tandem-Organized and Oligomeric G-Actin Binding Proteins. *Curr Biol.* 28, 1536-  
490 1547 e1539.

491 Kwak, J.S., Jeong, H.G., and Satchell, K.J. (2011). *Vibrio vulnificus* rtxA1 gene recombination  
492 generates toxin variants with altered potency during intestinal infection. *Proc Natl Acad Sci U S*  
493 *A.* 108, 1645-1650.

494 Lin, W., Fullner, K.J., Clayton, R., Sexton, J.A., Rogers, M.B., Calia, K.E., Calderwood, S.B.,  
495 Fraser, C., and Mekalanos, J.J. (1999). Identification of a *Vibrio cholerae* RTX toxin gene cluster  
496 that is tightly linked to the cholera toxin prophage. *Proc Natl Acad Sci U S A.* 96, 1071-1076.

497 Livak, K.J., and Schmittgen, T.D. (2001). Analysis of relative gene expression data using real-  
498 time quantitative PCR and the  $2(-\Delta\Delta C(T))$  Method. *Methods.* 25, 402-408.

499 Love, M.I., Huber, W., and Anders, S. (2014). Moderated estimation of fold change and  
500 dispersion for RNA-seq data with DESeq2. *Genome Biol.* 15, 550.

501 Ma, A.T., and Mekalanos, J.J. (2010). In vivo actin cross-linking induced by *Vibrio cholerae* type  
502 VI secretion system is associated with intestinal inflammation. *Proc Natl Acad Sci U S A.* 107,  
503 4365-4370.

504 Mahida, Y.R., Makh, S., Hyde, S., Gray, T., and Borriello, S.P. (1996). Effect of *Clostridium*  
505 *difficile* toxin A on human intestinal epithelial cells: induction of interleukin 8 production and  
506 apoptosis after cell detachment. *Gut.* 38, 337-347.

507 Martinez-Lopez, N., Athonvarangkul, D., Mishall, P., Sahu, S., and Singh, R. (2013). Autophagy  
508 proteins regulate ERK phosphorylation. *Nat Commun.* 4, 2799.

509 Murciano, C., Lee, C.T., Fernandez-Bravo, A., Hsieh, T.H., Fouz, B., Hor, L.I., and Amaro, C.  
510 (2017). MARTX Toxin in the Zoonotic Serovar of *Vibrio vulnificus* Triggers an Early Cytokine  
511 Storm in Mice. *Front Cell Infect Microbiol.* 7, 332.

512 Nogales-Cadenas, R., Carmona-Saez, P., Vazquez, M., Vicente, C., Yang, X., Tirado, F.,  
513 Carazo, J.M., and Pascual-Montano, A. (2009). GeneCodis: interpreting gene lists through

514 enrichment analysis and integration of diverse biological information. *Nucleic Acids Res.* 37,  
515 W317-322.

516 Olivier, V., Haines, G.K., 3rd, Tan, Y., and Satchell, K.J. (2007). Hemolysin and the  
517 multifunctional autoprocessing RTX toxin are virulence factors during intestinal infection of mice  
518 with *Vibrio cholerae* El Tor O1 strains. *Infect Immun.* 75, 5035-5042.

519 Olivier, V., Queen, J., and Satchell, K.J. (2009). Successful small intestine colonization of adult  
520 mice by *Vibrio cholerae* requires ketamine anesthesia and accessory toxins. *PLoS One.* 4,  
521 e7352.

522 Peterson, L.W., and Artis, D. (2014). Intestinal epithelial cells: regulators of barrier function and  
523 immune homeostasis. *Nat Rev Immunol.* 14, 141-153.

524 Philippe, N., Alcaraz, J.P., Coursange, E., Geiselmann, J., and Schneider, D. (2004).  
525 Improvement of pCVD442, a suicide plasmid for gene allele exchange in bacteria. *Plasmid.* 51,  
526 246-255.

527 Prochazkova, K., Shuvalova, L.A., Minasov, G., Voburka, Z., Anderson, W.F., and Satchell, K.J.  
528 (2009). Structural and molecular mechanism for autoprocessing of MARTX toxin of *Vibrio*  
529 *cholerae* at multiple sites. *J Biol Chem.* 284, 26557-26568.

530 Qadri, F., Raqib, R., Ahmed, F., Rahman, T., Wenneras, C., Das, S.K., Alam, N.H., Mathan,  
531 M.M., and Svennerholm, A.M. (2002). Increased levels of inflammatory mediators in children  
532 and adults infected with *Vibrio cholerae* O1 and O139. *Clin Diagn Lab Immunol.* 9, 221-229.

533 Queen, J., and Satchell, K.J. (2012). Neutrophils are essential for containment of *Vibrio*  
534 *cholerae* to the intestine during the proinflammatory phase of infection. *Infect Immun.* 80, 2905-  
535 2913.

536 Rodriguez, B.L., Rojas, A., Campos, J., Ledon, T., Valle, E., Toledo, W., and Fando, R. (2001).  
537 Differential interleukin-8 response of intestinal epithelial cell line to reactogenic and  
538 nonreactogenic candidate vaccine strains of *Vibrio cholerae*. *Infect Immun.* 69, 613-616.

539 Russell, R., Wang, H., Benitez, J.A., and Silva, A.J. (2018). Deletion of gene encoding the  
540 nucleoid-associated protein H-NS unmask hidden regulatory connections in El Tor biotype  
541 *Vibrio cholerae*. *Microbiology*. *164*, 998-1003.

542 Satchell, K.J. (2015). Multifunctional-autoprocessing repeats-in-toxin (MARTX) Toxins of  
543 *Vibrios*. *Microbiol Spectr*. *3*, VE-0002-2014.

544 Satchell, K.J., Jones, C.J., Wong, J., Queen, J., Agarwal, S., and Yildiz, F.H. (2016). Phenotypic  
545 Analysis Reveals that the 2010 Haiti Cholera Epidemic Is Linked to a Hypervirulent Strain. *Infect*  
546 *Immun*. *84*, 2473-2481.

547 Schwartz, M. (2004). Rho signalling at a glance. *J Cell Sci*. *117*, 5457-5458.

548 Sheahan, K.L., Cordero, C.L., and Satchell, K.J. (2004). Identification of a domain within the  
549 multifunctional *Vibrio cholerae* RTX toxin that covalently cross-links actin. *Proc Natl Acad Sci U*  
550 *S A*. *101*, 9798-9803.

551 Sheahan, K.L., and Satchell, K.J. (2007). Inactivation of small Rho GTPases by the  
552 multifunctional RTX toxin from *Vibrio cholerae*. *Cell Microbiol*. *9*, 1324-1335.

553 Shen, A., Lupardus, P.J., Albrow, V.E., Guzzetta, A., Powers, J.C., Garcia, K.C., and Bogoy, M.  
554 (2009). Mechanistic and structural insights into the proteolytic activation of *Vibrio cholerae*  
555 MARTX toxin. *Nat Chem Biol*. *5*, 469-478.

556 Son, M.S., Megli, C.J., Kovacicova, G., Qadri, F., and Taylor, R.K. (2011). Characterization of  
557 *Vibrio cholerae* O1 El Tor biotype variant clinical isolates from Bangladesh and Haiti, including a  
558 molecular genetic analysis of virulence genes. *J Clin Microbiol*. *49*, 3739-3749.

559 Soriani, M., Bailey, L., and Hirst, T.R. (2002). Contribution of the ADP-ribosylating and receptor-  
560 binding properties of cholera-like enterotoxins in modulating cytokine secretion by human  
561 intestinal epithelial cells. *Microbiology*. *148*, 667-676.

562 Tabas-Madrid, D., Nogales-Cadenas, R., and Pascual-Montano, A. (2012). GeneCodis3: a non-  
563 redundant and modular enrichment analysis tool for functional genomics. *Nucleic Acids Res*. *40*,  
564 W478-483.

565 Weill, F.X., Domman, D., Njamkepo, E., Tarr, C., Rauzier, J., Fawal, N., Keddy, K.H., Salje, H.,  
566 Moore, S., Mukhopadhyay, A.K., et al. (2017). Genomic history of the seventh pandemic of  
567 cholera in Africa. *Science*. 358, 785-789.

568 Woida, P.J., and Satchell, K.J.F. (2018). Coordinated delivery and function of bacterial MARTX  
569 toxin effectors. *Mol Microbiol*. 107, 133-141.

570 Woolery, A.R., Yu, X., LaBaer, J., and Orth, K. (2014). AMPylation of Rho GTPases subverts  
571 multiple host signaling processes. *J Biol Chem*. 289, 32977-32988.

572 Xu, H., Yang, J., Gao, W., Li, L., Li, P., Zhang, L., Gong, Y.N., Peng, X., Xi, J.J., Chen, S., et al.  
573 (2014). Innate immune sensing of bacterial modifications of Rho GTPases by the Pysin  
574 inflammasome. *Nature*. 513, 237-241.

575 Zhou, X., Gao, D.Q., Michalski, J., Benitez, J.A., and Kaper, J.B. (2004). Induction of interleukin-  
576 8 in T84 cells by *Vibrio cholerae*. *Infect Immun*. 72, 389-397.

577 Zhou, Y., Huang, C., Yin, L., Wan, M., Wang, X., Li, L., Liu, Y., Wang, Z., Fu, P., Zhang, N., et  
578 al. (2017). N(epsilon)-Fatty acylation of Rho GTPases by a MARTX toxin effector. *Science*. 358,  
579 528-531.

580

581

582 FIGURES AND FIGURE LEGENDS

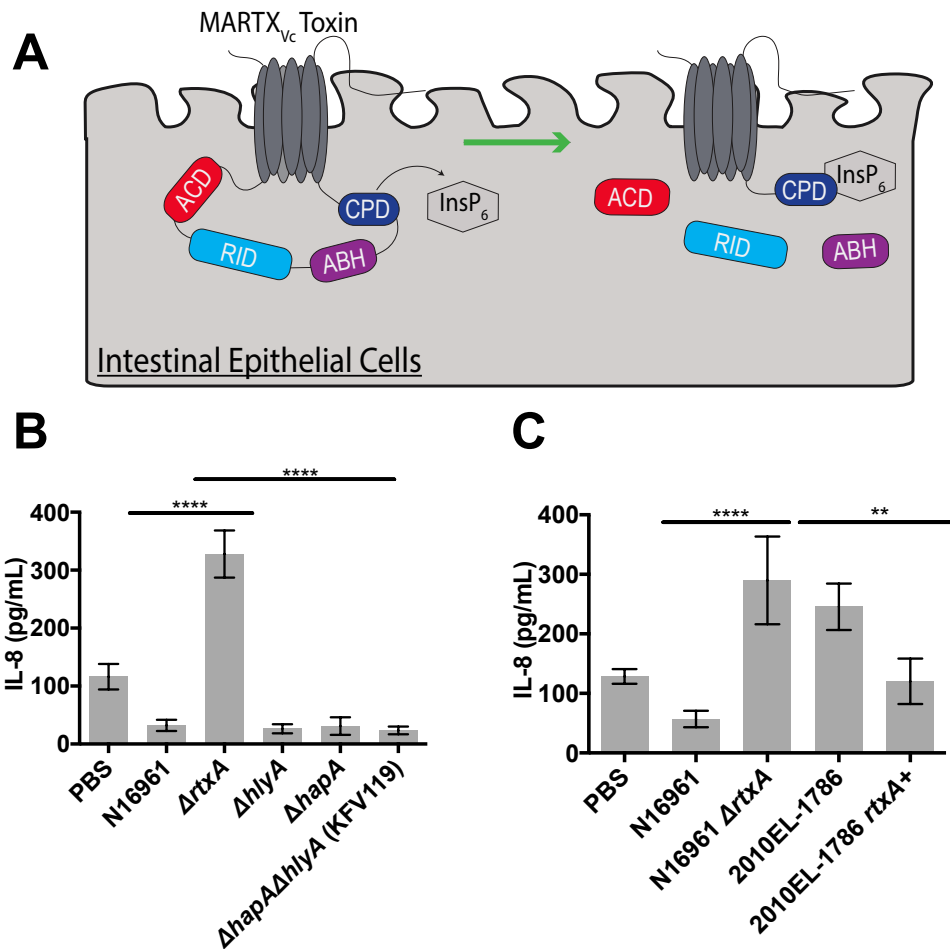

583

584 **Figure 1. The MARTX<sub>vc</sub> toxin, and not other *V. cholerae* accessory toxins, suppress IL-8**  
585 **in IECs**

586 (A) Schematic of MARTX<sub>vc</sub> toxin activity in IECs. The MARTX<sub>vc</sub> toxin utilizes N- and C-terminal  
587 regions to form a pore in a target eukaryotic membrane and translocate the central effector  
588 domains and CPD. CPD binds to InsP<sub>6</sub>, which activates the domain autoproteolytic activity to  
589 separate and release the three effector domains from the holotoxin.

590 (B, C) IL-8 secretion to the media from T84 intestinal cells inoculated with *V. cholerae* strains as  
591 indicated. Data are reported as means  $\pm$  standard deviation (s.d.) ( $n=3-6$ ) (\*\*  $p<0.01$ ,  
592 \*\*\*\* $p<0.0001$ , One-way ANOVA with multiple comparison's test).

593

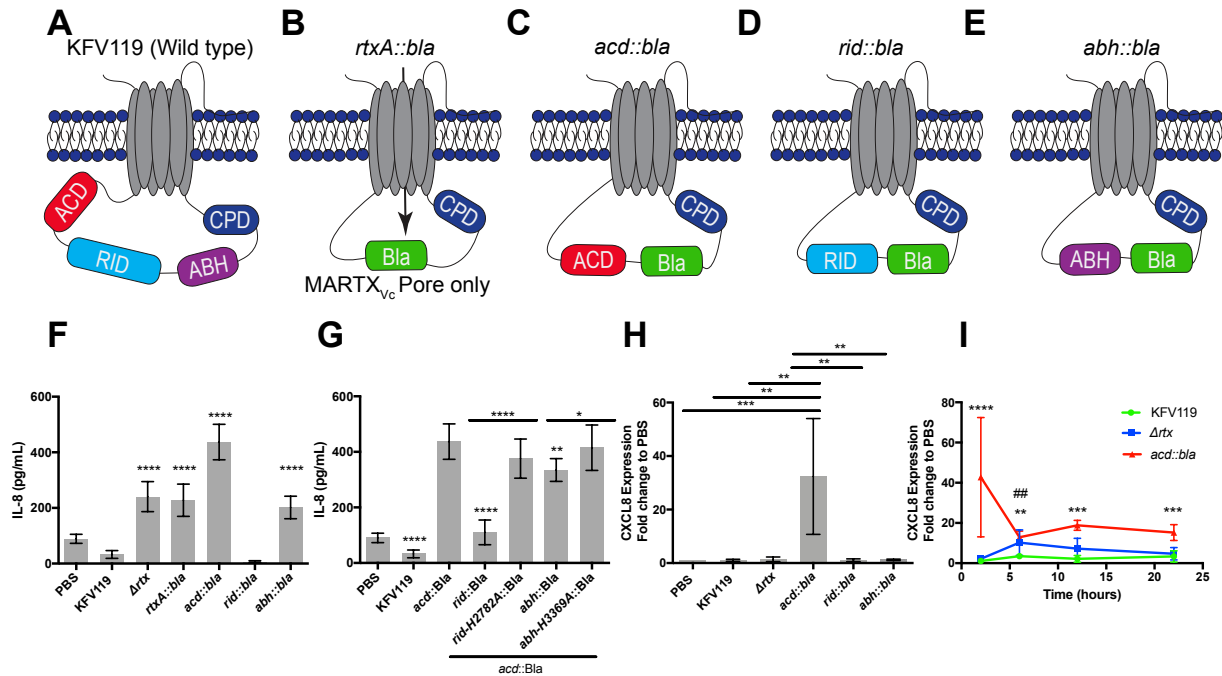

594

595 **Figure 2. The MARTX<sub>Vc</sub> toxin effector domains, and not the pore, differentially regulate**

596 **IL-8 secretion in IECs**

597 (A-E) Schematics of MARTX<sub>Vc</sub> toxin effector arrangements in strains modified to translocate β-  
598 lactamase (Bla) and single effector gain-of-function strains (Dolores et al., 2015).

599 (F, G) IL-8 secretion measured from T84 intestinal cells inoculated with one or two *V. cholerae*  
600 effector-free Bla and single effector gain of function strains as indicated. Data are reported as  
601 means ± s.d. (\*p<0.05, \*\* p<0.01, \*\*\*\*p<0.0001, One-way ANOVA with multiple comparisons).

602 (H, I) qPCR detection of CXCL8 expression from T84 cells at (H) 120 min post-inoculation or (I)  
603 over 22 hours with *V. cholerae* strains as indicated. Data are reported as means ± s.d. (\*\*  
604 p<0.01, \*\*\*p<0.001, \*\*\*\*p<0.0001, One-way ANOVA with multiple comparisons. For panel I,

605 multiple comparisons between *acd::bla* and PBS were set as a normalized fold change of 1. ##  
606 p<0.001, One-way ANOVA with multiple comparisons between  $\Delta$ rtx and PBS set as a

607 normalized fold change of 1).

608

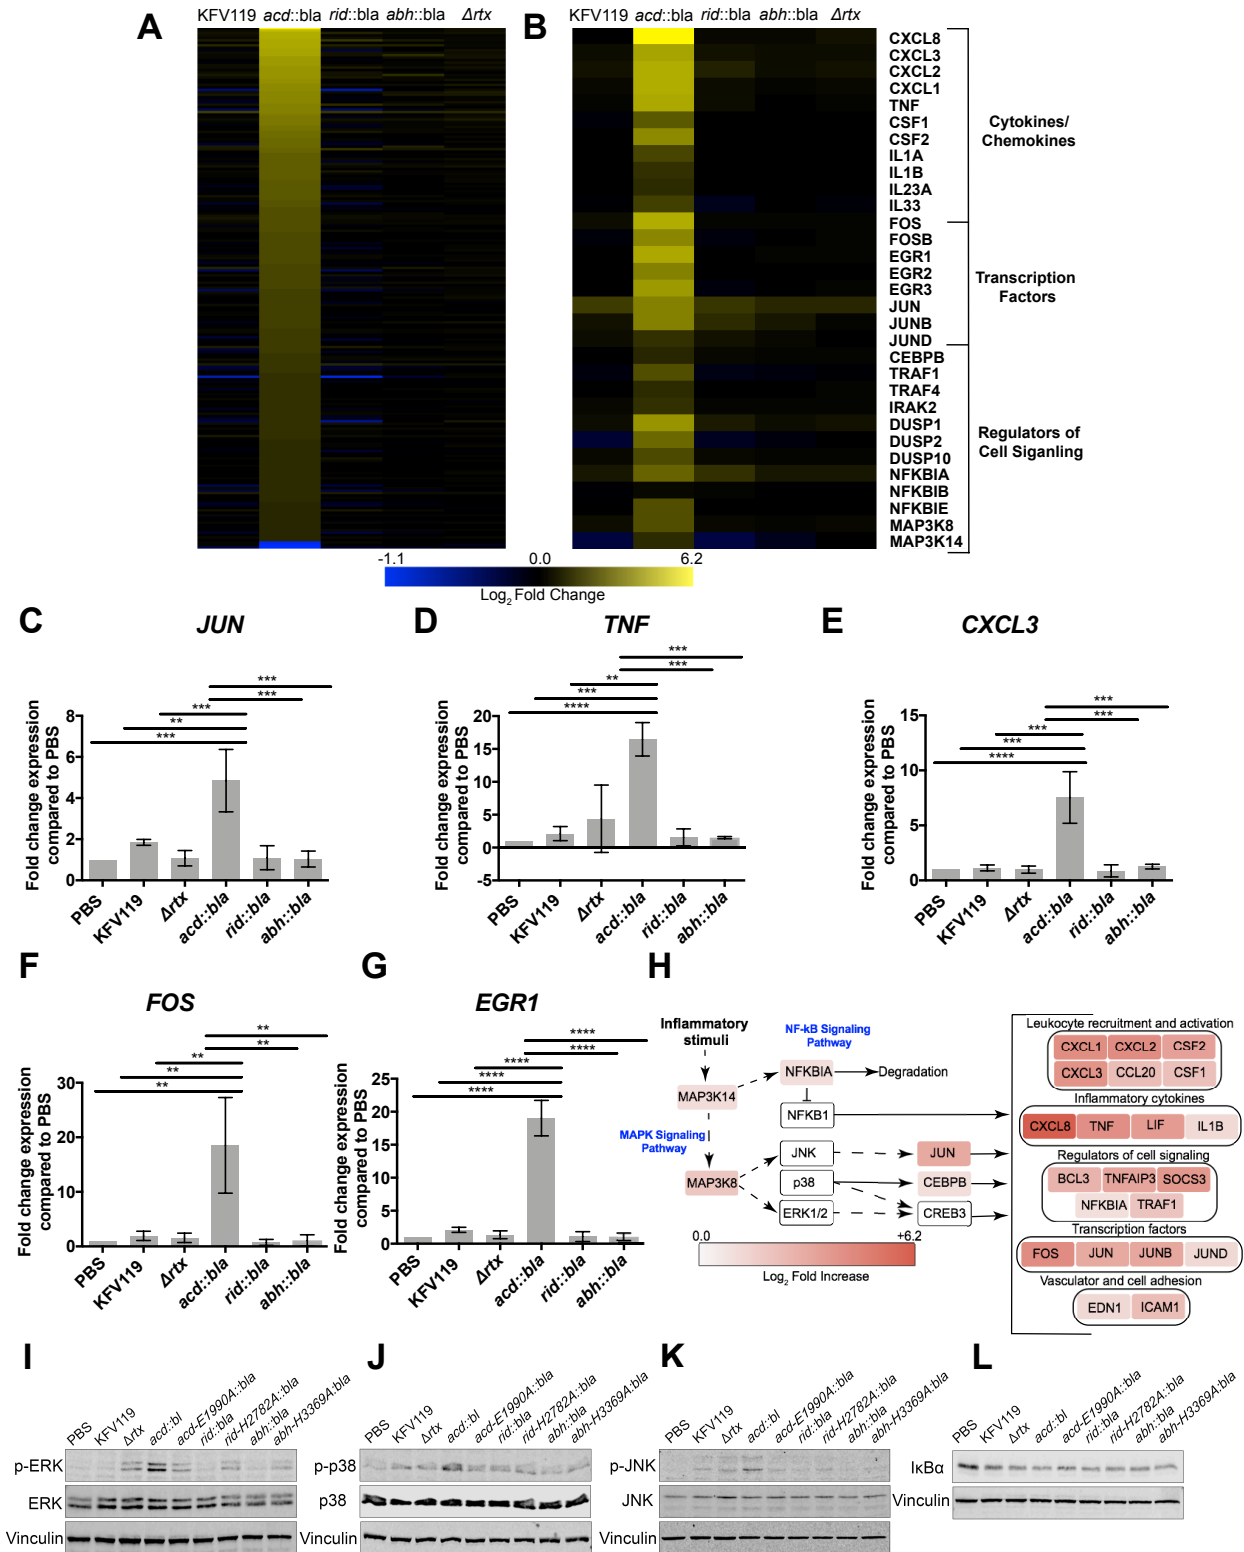

609

610 **Figure 3. ACD induces a global proinflammatory response that is silenced when**

611 **delivered with RID and ABH on the wild-type toxin**



612 (A, B) Heat maps of differentially expressed genes identified in RNA-sequencing analysis of T84  
613 cells inoculated with *V. cholerae* strains as indicated. Heat maps represent statistically  
614 significant differentially expressed genes with a  $-1 \leq 0 \leq 1$  log<sub>2</sub> fold change cut off.  
615 (C-G) qPCR validation of select differentially expressed genes. Data are reported as the mean ±  
616 s.d (\*\* p<0.01, \*\*\*p<0.001, \*\*\*\*p<0.0001, One-way ANOVA with multiple comparisons between  
617 *acd::bla* and indicated strain. No other strains induced a statistically different response  
618 compared to the normalized PBS control or another strain).  
619 (H) ACD significantly upregulated genes involved in regulation or downstream of the MAPK and  
620 NF-κB signaling pathways.  
621 (I-L) Western blot analysis of (I) phospho-ERK, (J) phospho-p38, (K) phospho-JNK, and (L)  
622 IκBα degradation from T84 cells inoculated with *V. cholerae* strain as indicated. Blots are  
623 representative of three independent experiments.  
624

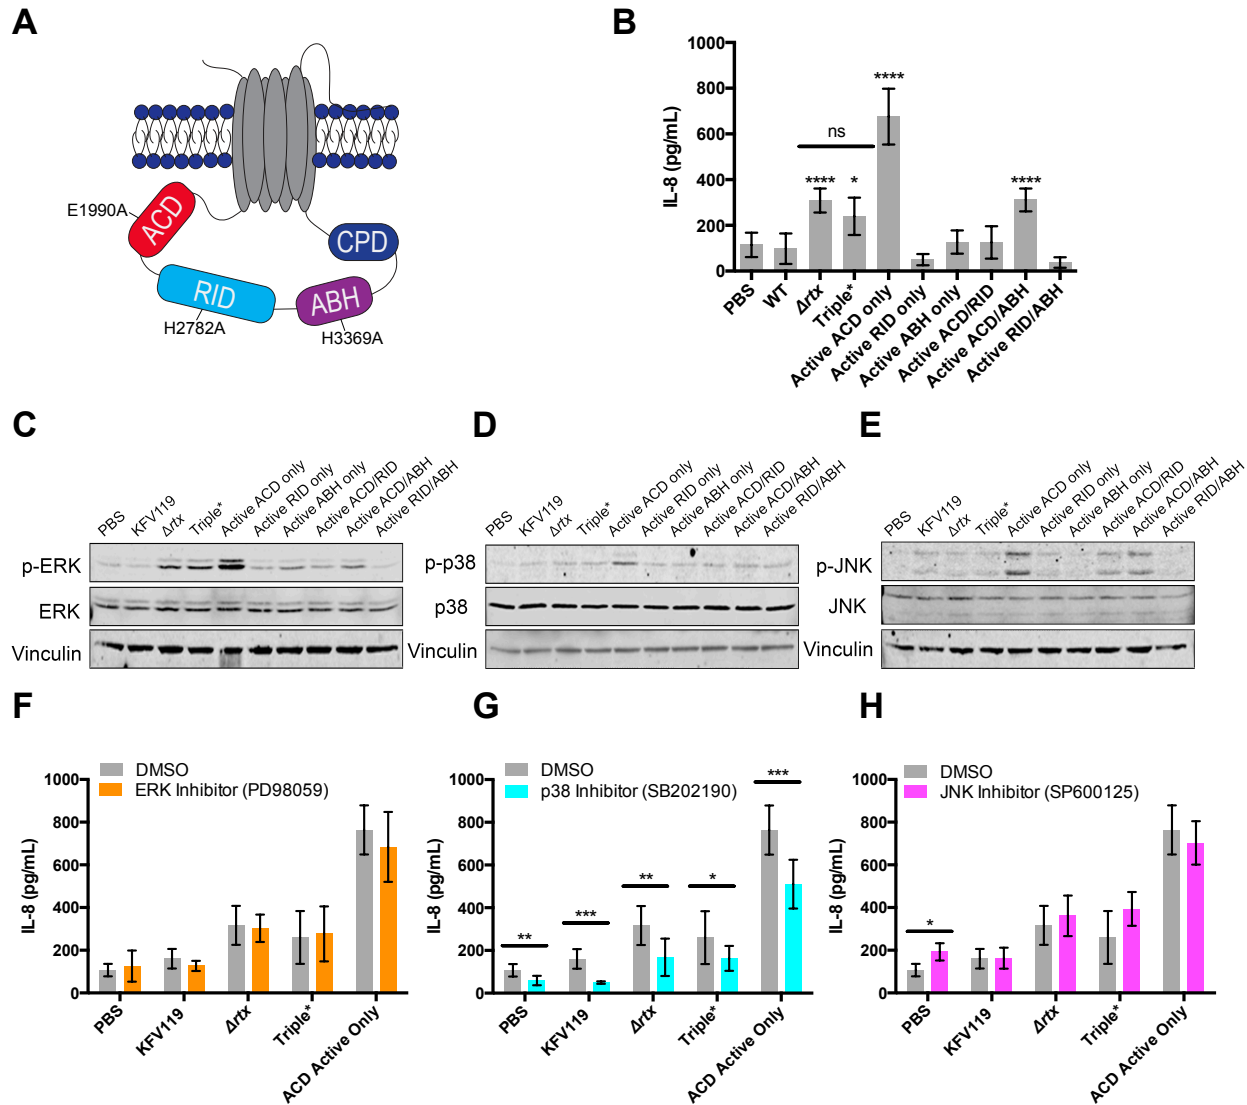

625

626 **Figure 4. Both RID and ABH suppress ACD induced proinflammatory response**

627 (A) Schematic of MARTX<sub>vc</sub> toxin identifying catalytic residues mutated in single, double, and  
 628 triple catalytically inactive MARTX<sub>vc</sub> toxin effector strains.

629 (B) IL-8 secretion measured from T84 cells inoculated with *V. cholerae* strains as indicated.

630 Data are reported as means ± s.d (\*p < 0.05, \*\* p < 0.01, \*\*\*\*p < 0.0001, One-way ANOVA with  
 631 multiple comparisons).

632 (C-E) Western blot analysis of (C) phospho-ERK, (D) phospho-p38, and (E) phospho-JNK from  
633 T84 cells inoculated with strains as indicated. Blots are representative of three independent  
634 experiments.  
635 (F-H) IL-8 secretion measured from T84 cells pre-treated with (F) ERK inhibitor PD98059, (G)  
636 p38 inhibitor SB202190, and (H) JNK inhibitor SP600125. Data are reported as means  $\pm$   
637 s.d. (\* $p < 0.05$ , \*\*  $p < 0.01$ , \*\*\*\* $p < 0.0001$ , Student's t-test).  
638

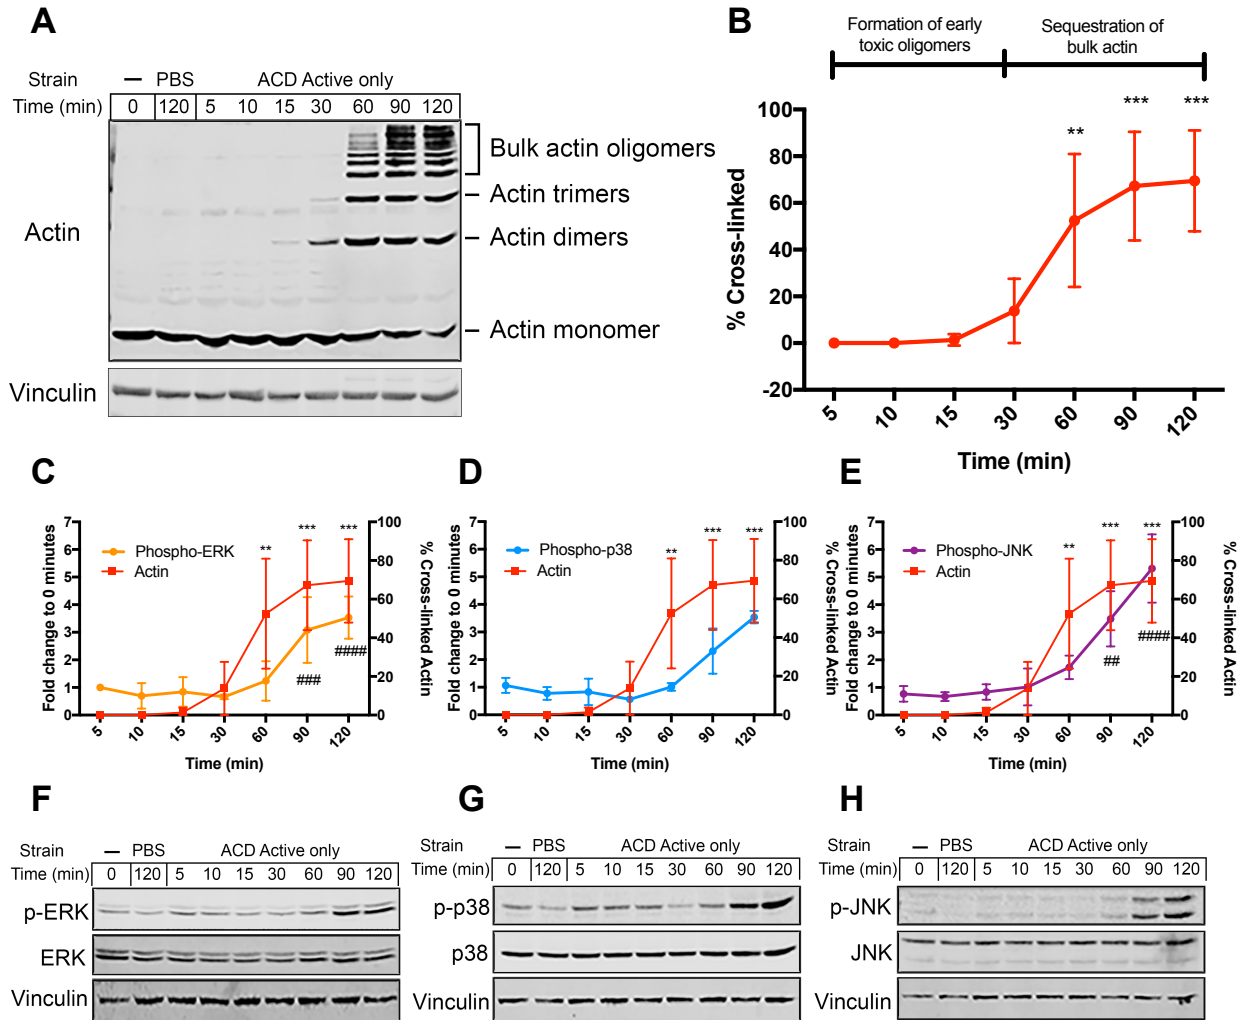

639

640 **Figure 5. ACD activates proinflammatory MAPK signaling following sequestration of bulk**  
 641 **actin**

642 (A, B) Representative western blot and quantification ( $n=3$ ) of actin cross-linking from T84 cells  
 643 inoculated with the ACD only strain of *V. cholerae*. Actin oligomers start forming around 5 min to  
 644 sequester actin binding proteins while significant cross-linking and sequestration of bulk actin  
 645 and cytoskeleton destruction start forming at 60 min. Data are reported as means  $\pm$  s.d. ( \*\*  
 646  $p<0.01$ , \*\*\* $p<0.001$ , One-way ANOVA with multiple comparisons between indicated timepoints  
 647 and 0% actin cross-linking from 0 min control).

648 (C - E) Fold change of (C) phospho-ERK ( $n=4$ ), (D) phospho-p38 ( $n=2$ ), and (E) phospho-JNK  
 649 ( $n=3$ ) compared to 0 min control quantified from western blot band densities from T84 cells

650 inoculated with the ACD Active only strain plotted with quantification of percent actin cross-  
651 linked over the 120 min incubation. Data are reported as means  $\pm$  s.d ( \*\*  $p < 0.01$ , \*\*\* $p < 0.001$ ,  
652 One-way ANOVA with multiple comparisons between indicated timepoints and 0% actin cross-  
653 linking from 0 min control from Figure 5B. ##  $p < 0.01$ , ###  $p < 0.001$ , ####  $p < 0.0001$ , One-way  
654 ANOVA with multiple comparisons between phospho-ERK/JNK at indicated timepoints and a 0  
655 min control with a normalized fold change of 1). A third biological replicate was performed for  
656 phospho-p38 quantification but the ACD Active only strain induced a stochastically high 273-fold  
657 change compared to 0 min control (Figure S3A-B).  
658 (F-H) Representative western blots ( $n=3-4$ ) of (F) phospho-ERK, (G) phospho-p38, and (H)  
659 phospho-JNK activation during 120 min bacterial challenge.  
660

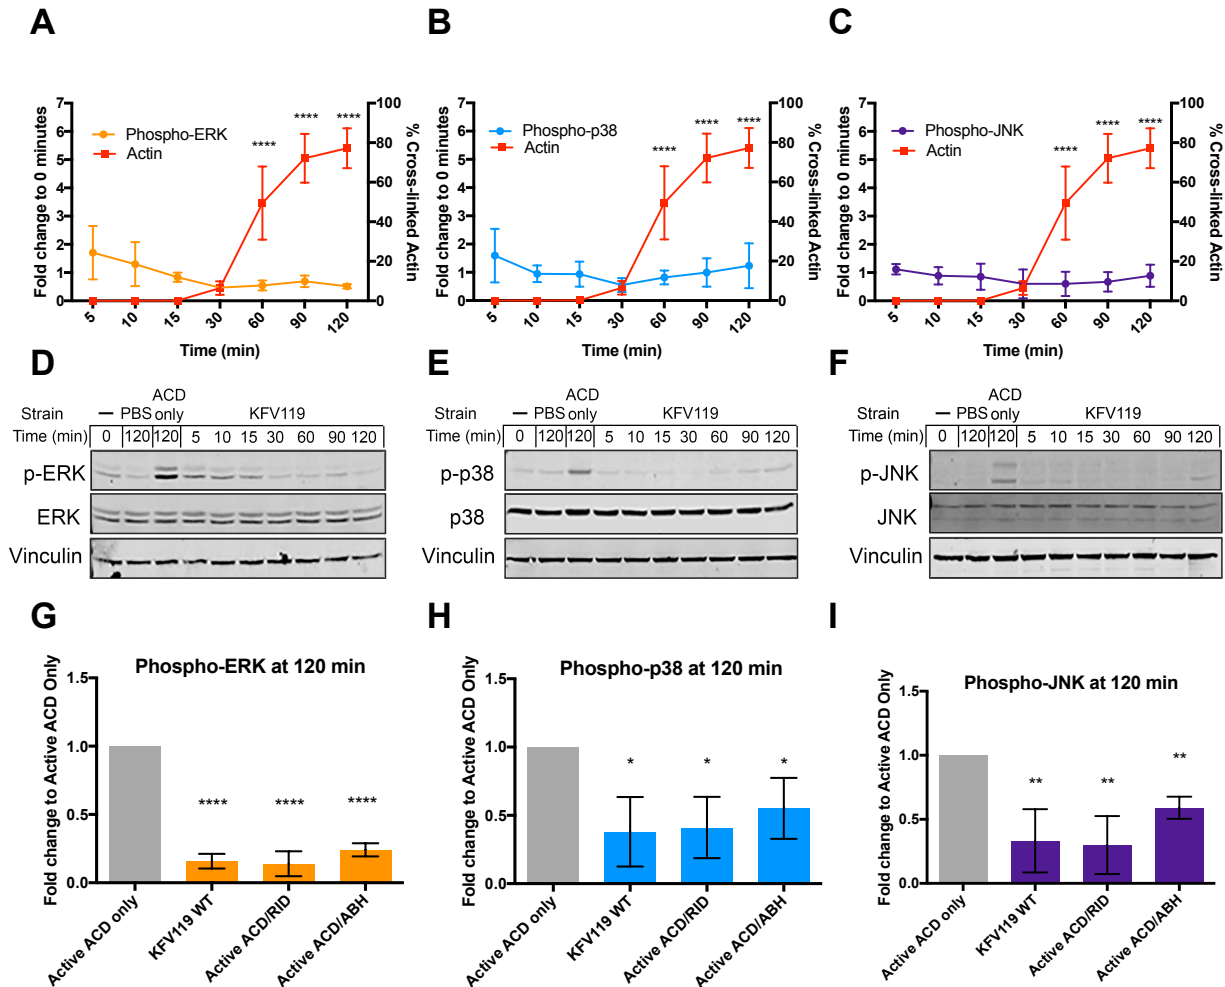

661

662 **Figure 6. RID and ABH block MAPK signaling prior to host detection to ACD**

663 **sequestration of bulk actin**

664 (A–C) Fold change of (A) phospho-ERK, (B) phospho-p38, and (C) phospho-JNK compared to 0

665 min control quantified from western blot band densities from T84 cells inoculated with the WT

666 KJV119 *V. cholerae* strain plotted with quantification of percent actin cross-linked over the 120

667 min incubation. Data are reported as the mean  $\pm$  s.d. (\*\*\*\* $p$ <0.0001, One-way ANOVA with

668 multiple comparisons between indicated timepoints and 0% actin cross-linking from 0 min

669 control).

670 (D–F) Representative western blots of (D) phospho-ERK, (E) phospho-p38, and (F) phospho-

671 JNK activation during 120 min bacterial challenge.

672 (G-I) Quantification of fold change in (G) phospho-ERK, (H) phospho-p38, and (I) phospho-JNK  
673 compared to the Active ACD only strain at 120 minutes post-inoculation. Data are reported as  
674 the mean  $\pm$  s.d (\*p<0.05, \*\*p<0.01, \*\*\*\*p<0.0005, Student's t-tests compared to Active ACD only  
675 strain). No statistically significant difference was observed between KfV119, ACD/RID Active,  
676 or ACD/ABH Active strains compared to each other.  
677

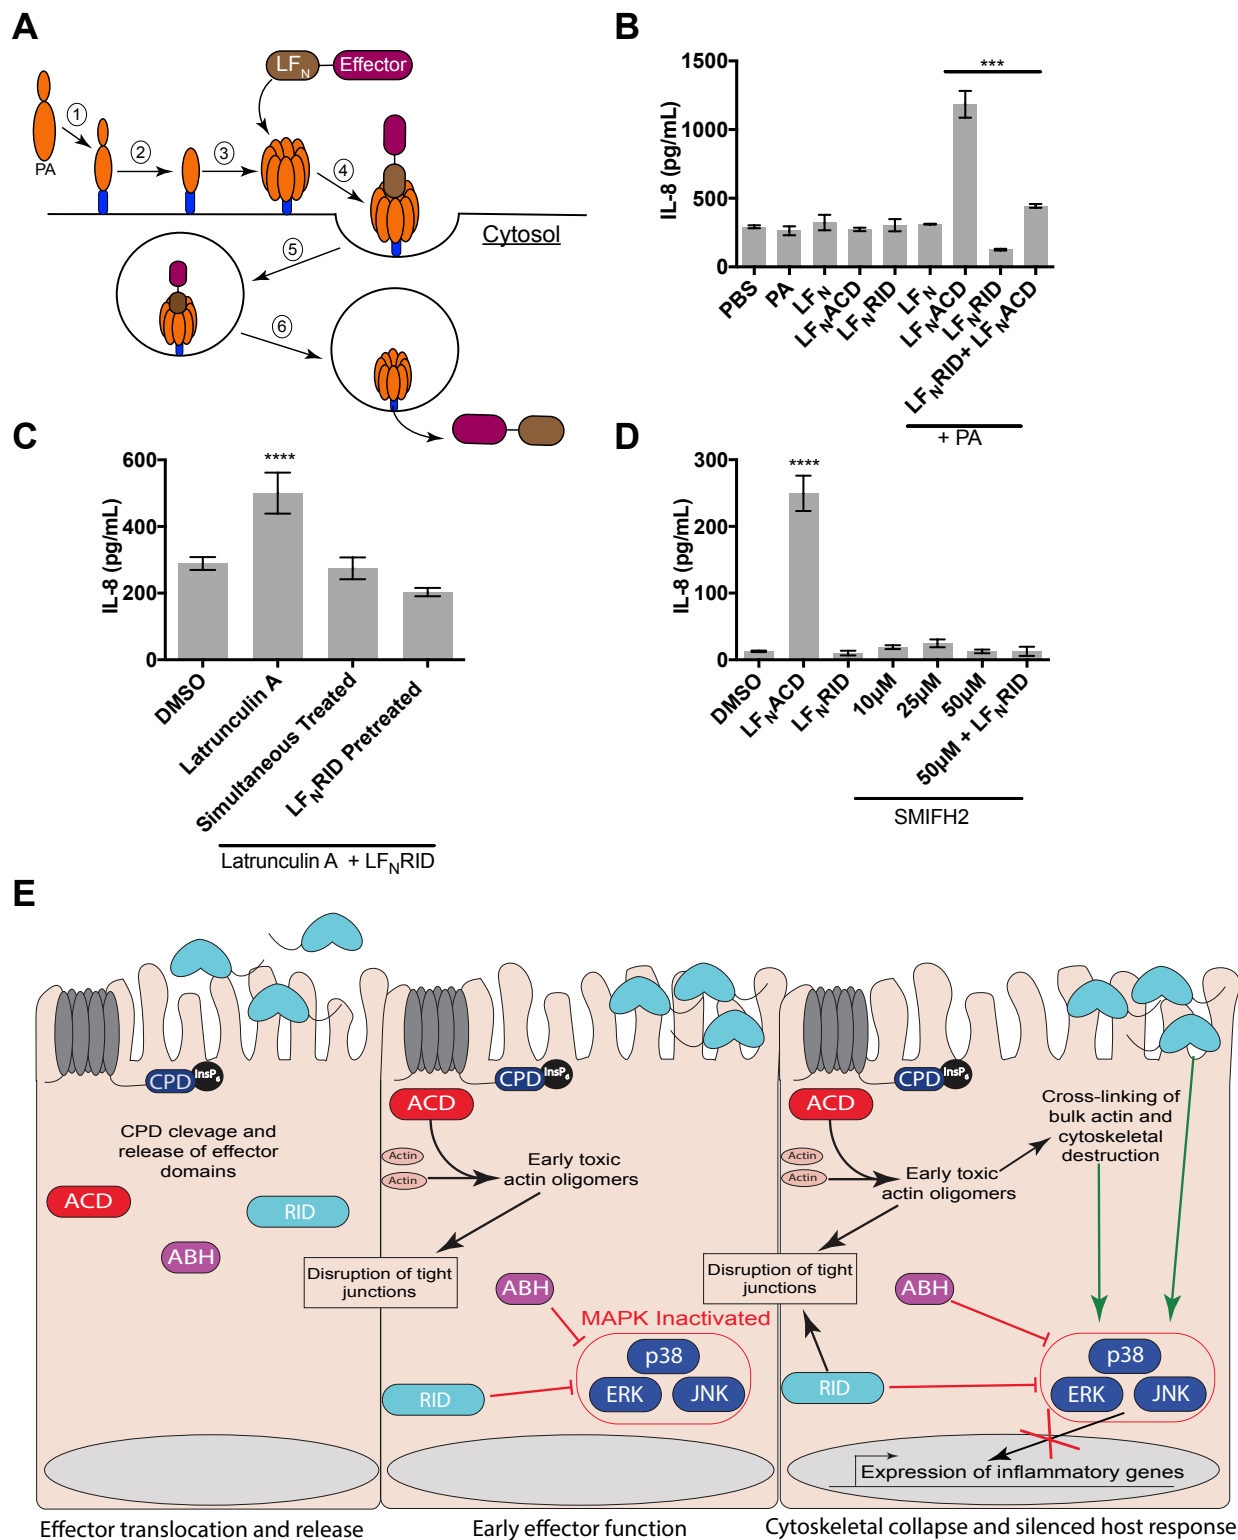

678

679

**Figure 7. Cytoskeletal collapse, and not formation of toxic actin oligomers, activates**

680

**proinflammatory response in IECs**



681 (A) Schematic of LF<sub>N</sub>- Effector intoxication. (1) PA binds to the anthrax toxin receptor. (2) PA is  
682 processed to its 63 kDa active form (PA<sub>63</sub>). (3) PA<sub>63</sub> oligomerizes to a heptamer complex. (4)  
683 The LF<sub>N</sub> domain of the LF<sub>N</sub>-MARTX effector fusion binds to the PA<sub>63</sub> heptamer. (5) The LF<sub>N</sub>-  
684 Effector + PA<sub>63</sub> complex enters the cell through receptor mediated endocytosis. (6) Acidification  
685 of the vacuole promotes the PA<sub>63</sub> heptamer to form a pore in the vacuole membrane to release  
686 LF<sub>N</sub>-Effector fusion protein into the cytosol.

687 (B) IL-8 secretion measured from T84 intestinal cells treated with LF<sub>N</sub> alone, LF<sub>N</sub>ACD, or  
688 LF<sub>N</sub>RID in the presence or absence of PA. Data are reported as means ± s.d.( \*\*\*\*p<0.0001,  
689 One-way ANOVA with multiple comparisons).

690 (C, D) IL-8 measured from T84 cells treated with (C) latrunculin A alone or (D) SMIFH2 in  
691 combination with LF<sub>N</sub>RID in the presence of PA where indicated. Data are reported as means ±  
692 s.d.(\*\*\* p<0.001, \*\*\*\*p<0.0001, One-way ANOVA with multiple comparisons).

693 (E) Model of interplay between the MARTX<sub>Vc</sub> toxin multiple functions. (Left) MARTX<sub>Vc</sub> toxin  
694 effector domains are separated from the holotoxin. (Middle) During the early stages of effector  
695 activity, ACD actin cross-linking forms toxic actin oligomers to disrupt tight junctions. RID and  
696 ABH inactive MAPK signaling pathways. (Right). Inactivation of MAPK pathways blocks the  
697 inflammatory response to ACD destruction of the cytoskeleton and host detection of bacterial  
698 PAMPs.

## 699 **Materials and Methods**

### 700 Antibodies and chemical reagents

701 Antibodies used in this study include phospho-p44/p42 MAPK (ERK1/2) (Cell Signaling  
702 Technology, #4337S), p44/p42 MAPK (ERK1/2) (Cell Signaling Technology, #4965S), phospho-  
703 p38 MAPK (Cell Signaling Technology, #9211S), p38 MAPK (Cell Signaling Technology,  
704 #9212S), phospho-SAPK/JNK (Cell Signaling Technology, #9255S), SAPK/JNK (Cell Signaling  
705 Technology, #9252S), Vinculin (Cell Signaling Technology, #13901), IKB $\alpha$  (Cell Signaling  
706 Technology, #9242S), Tubulin (Cell Signaling Technology, #2144), GAPDH (Santa Cruz, #sc-  
707 25779), Actin (Sigma, #A2066), and LICOR IRDye 800CW/680LT secondary antibodies  
708 (LICOR, #926-3221, #926-3211, #926-68070, #926-68071). Chemical reagents used in this  
709 study were ERK MAPK inhibitor PD98059 (Cell Signaling Technology, #9900L), p38 MAPK  
710 inhibitor SB202190 (Cell Signaling Technology, #S7067), JNK MAPK inhibitor SP600125  
711 (Abcam, #120065), Latrunculin A (Millipore, #428021), and SMIFH2 (Fisher Scientific,  
712 #440110).

713

### 714 Cell culture

715 T84 male colorectal carcinoma cells acquired from the American Type Culture Collection  
716 (ATCC, #CCL-248) were cultured in Dulbecco's Modified Eagle Medium/Nutrient Mixture F-12  
717 (DMEM/F12), GlutaMAX supplement (ThermoFisher Gibco, #10565018) with 10% (w/v) fetal  
718 bovine serum (FBS, Gemini Bio-products, #900-108) and 0.1% penicillin/streptomycin  
719 (ThermoFisher Gibco). Cells were maintained at 37°C in the presence of 5% CO<sub>2</sub>.

720

### 721 Bacterial growth medium

722 Bacterial strains and plasmids used in this study are listed in Table S1. All *V. cholerae*  
723 strains used in this study are derived from spontaneous streptomycin-resistant derivatives of

724 clinical isolates N16961 or 2010EL-1796. *V. cholerae* and *Escherichia coli* were grown on Luria-  
725 Bertani (LB) broth or agar. *V. cholerae* medium was supplemented with 100  $\mu\text{g mL}^{-1}$   
726 streptomycin, 2  $\mu\text{g mL}^{-1}$  chloramphenicol, 100  $\mu\text{g mL}^{-1}$  ampicillin, or 5% (w/v) sucrose as  
727 needed. *E. coli* growth medium was supplemented with 10  $\mu\text{g mL}^{-1}$  chloramphenicol, 100  $\mu\text{g mL}^{-1}$   
728 <sup>1</sup> ampicillin, or 50  $\mu\text{g mL}^{-1}$  kanamycin as needed.

729

### 730 Treatment of cells with live bacteria

731 *V. cholerae* strains were grown at 30°C in LB medium supplemented with 100  $\mu\text{g mL}^{-1}$   
732 streptomycin. Overnight cultures were diluted 1:100 and grown at 30°C with shaking until  
733 exponential phase ( $\text{OD}_{600} \approx 0.40-0.60$ ). Bacteria from 1 mL were pelleted by centrifugation and  
734 resuspended in phosphate buffered saline (PBS) to a final concentration of  $5 \times 10^8$  bacterial  
735 cells  $\text{mL}^{-1}$ . T84 cells (seeded the day before into cell culture-treated plates) were twice washed  
736 with PBS and then media changed to antibiotic- and FBS-free DMEM/F12. Resuspended *V.*  
737 *cholerae* was added to media over cells (multiplicity of infection = 5). Inoculations were  
738 synchronized by centrifugation at 500  $\times g$  for 3 min. T84 cells were subsequently incubated at  
739 37°C in the presence of 5%  $\text{CO}_2$  until processed for downstream applications.

740

### 741 LF<sub>N</sub> Effector intoxication of T84 cells

742 LF<sub>N</sub> fusion proteins were expressed from pTCO24 (LF<sub>N</sub>ACD) and pKS119 (LF<sub>N</sub>RID) and  
743 purified as previously described (Cordero et al., 2006; Sheahan and Satchell, 2007). In brief, *E.*  
744 *coli* containing BL21(DE3)(pMagic) with overexpression plasmids were grown in Terrific broth  
745 and expression of protein induced with 1 mM isopropyl  $\beta$ -D-thiogalactopyranoside at 25°C  
746 overnight. Bacteria were harvested in Buffer A (10mM Tris, 500 mM NaCl pH 8.3), lysed by  
747 sonication, and lysate clarified by centrifugation at 16,000  $\times g$  for 30 min. The 6xHis-tagged  
748 recombinant proteins were purified using Ni-NTA HisTrap column followed by size-exclusion

749 chromatography using a Superdex 75 column in Buffer A with 5 mM  $\beta$ -mercaptoethanol using  
750 the ÄKTA protein purification system (GE Healthcare). Proteins were stored in 10% glycerol at  
751  $-80^{\circ}\text{C}$ .

752 For intoxication of cells, media was replaced over  $10^5$  cells previously seeded in a 12-well  
753 plate. 31.7 nM PA alone (List Labs, #171E) or in the presence of 13.6nM LF<sub>N</sub>, LF<sub>N</sub>-ACD, or LF<sub>N</sub>-  
754 RID was added to media and cells were incubated for 20 hr at  $37^{\circ}\text{C}$  in the presence of 5% CO<sub>2</sub>.  
755 For co-intoxication of 13.6 nM LF<sub>N</sub>ACD and LF<sub>N</sub>-RID, 3x excess PA was used to ensure equal  
756 translocation of both effectors.

757

#### 758 Construction of pDS132 *sacB*-counterselectable plasmids

759 Fragments (gBlocks) containing either the ACD E1990A mutation or the ABH H3369A  
760 mutation along with 500 base pairs up and downstream from the mutations were commercially  
761 synthesized. Each fragment also has additional secondary silent mutations to introduce novel  
762 MfeI and PstI restriction sites near the E1990A and H3369A mutations, respectively. Sequences  
763 are listed in Table S2. Fragments were cloned into pDS132 digested with SphI (New England  
764 Biolabs, #R3182S) using Gibson Assembly (New England Biolabs, #E2611S) according to  
765 manufacturer's instructions. Plasmids were recovered and propagated in DH5 $\alpha$ *pir* on LB  
766 supplemented with chloramphenicol and confirmed by sequencing.

767

#### 768 Transfer of E1990A, H2782A, and H3369A mutations to the *V. cholerae* chromosome

769 The ACD E1990A and ABH H3369A mutations on the above pDS132-based plasmids  
770 were transferred to SM10 $\lambda$ *pir*. These mutations or the RID H2782A mutation from pSA129 were  
771 transferred to the *V. cholerae* chromosome by conjugation followed by *sacB*-dependent  
772 counterselection for double homologous recombination as previously described (Ahrens et al.,  
773 2013; Dolores et al., 2015). To confirm recombinants gained the desired mutations, regions

774 corresponding to the mutations were amplified by PCR, digested with the introduced novel  
775 restriction site, and products were separated on agarose gel. Presence of introduced mutations  
776 were also confirmed by sequencing.

777

#### 778 IL-8 enzyme-linked immunosorbent assay (ELISA)

779 1- to  $2 \times 10^5$  T84 cells seeded in a 12-well tissue culture treated plate were treated as  
780 described above for 2 hr. Media from inoculated cells was removed, cells were washed once  
781 with warm PBS and media changed to DMEM12 GlutaMAX media supplemented with serum,  
782 pen-strep, and  $100 \mu\text{g mL}^{-1}$  gentamicin. Cells were incubated for an additional 20 hr at  $37^\circ\text{C}$  in  
783 the presence of 5%  $\text{CO}_2$ . For IL-8 chemical inhibitor studies,  $10 \mu\text{M}$  of MAPK inhibitor or 0.33%  
784 DMSO control were added to T84 cells one hour prior to bacterial challenge. Inhibitors were  
785 reapplied following 2 hr bacterial challenge. Media from the T84 cells was harvested and spun  
786 down at  $20,000\times g$  for 1 min at  $4^\circ\text{C}$  and supernatant was collected. Concentration of IL-8 in cell  
787 media was measured using the IL-8 Human Matched Antibody Pair ELISA kit (ThermoFisher,  
788 #CHC1303) following manufacturer's instructions.

789

#### 790 Western blot analysis of actin crosslinking and cell signaling pathways

791  $1 \times 10^6$  T84 cells in a 6-well tissue culture dish were treated with various *V. cholerae*  
792 strains as described above for 2 hr. Cells were washed once with cold PBS and removed from  
793 the plate in  $150 \mu\text{L}$  lysis buffer (150 mM NaCl, 20 mM TRIS pH 7.5, 1% Triton X-100, and Pierce  
794 Protease and Phosphatase inhibitor added prior to use) using a cell scraper. Lysates were  
795 incubated on ice for 15 min and then clarified by centrifugation at  $20,000\times g$  at  $4^\circ\text{C}$  for 10 min.  
796 Concentration of protein in the collected supernatant fluid determined using the bicinchoninic  
797 (BCA) assay (ThermoFisher, #23227). Normalized samples were boiled for 5 min at  $95^\circ\text{C}$  in  
798 SDS loading buffer and protein separated on either a 10% or 15% SDS-polyacrylamide gel.

799 Proteins were transferred to nitrocellulose membranes and blocked in TBS (10 mM Tris pH=7.4,  
800 150 mM NaCl) with 5% (w/v) milk for 1 hour. Membranes were washed with TBS and then  
801 incubated in indicated primary antibodies 1:1000 in TBS with 5% (w/v) bovine serum album  
802 (BSA, Fisher Bioreagents) overnight at 4°C. Membranes were washed with TBS and probed in  
803 1:10,000 IRDye 800CW/680LT secondary antibody for 1 hour before being washed again and  
804 imaged using the LI-COR Bioscience Odyssey imaging system. Quantification of band density  
805 was conducted using Fiji/ImageJ.

806

#### 807 RNA-seq

808 The stranded mRNA-seq was conducted in the Northwestern University NUSeq Core  
809 Facility. Briefly, total RNA examples were checked for quality using RINs generated from Agilent  
810 Bioanalyzer 2100. RNA quantity was determined with Qubit fluorometer. The Illumina TruSeq  
811 Stranded mRNA Library Preparation Kit was used to prepare sequencing libraries from 750 ng  
812 of high-quality RNA samples (RIN=10). The Kit procedure was performed without modifications.  
813 This procedure includes mRNA purification and fragmentation, cDNA synthesis, 3' end  
814 adenylation, Illumina adapter ligation, library PCR amplification and validation. Illumina NextSeq  
815 500 Sequencer was used to sequence the libraries with the production of single-end, 75 bp  
816 reads.

817 The quality of DNA reads, in fastq format, was evaluated using FastQC. Adapters were  
818 trimmed, and reads of poor quality or aligning to rRNA sequences were filtered. The cleaned  
819 reads were aligned to the human reference genome using STAR (Dobin et al., 2013). Read  
820 counts for each gene were calculated using htseq-count (Anders et al., 2015). Normalization  
821 and differential expression were determined using DESeq2 (Love et al., 2014). The cutoff for  
822 determining significantly differentially expressed genes was an FDR-adjusted p-value less than  
823 0.05. A pathway analysis was performed on both gene lists using GeneCoDis (Carmona-Saez

824 et al., 2007; Nogales-Cadenas et al., 2009; Tabas-Madrid et al., 2012) to identify pathways that  
825 are enriched with genes that are upregulated and downregulated.

826

### 827 Quantitative RT-PCR

828 1 x 10<sup>6</sup> T84 cells in a 6-well tissue culture treated plate were treated with *V. cholerae* as  
829 described above. At indicated time points, mRNA was harvested using the Qiagen RNeasy kit  
830 (Qiagen, #74014) following manufacturer's instructions. RNA isolated was measured using a  
831 Nano-drop 100 spectrophotometer. Reverse transcription was performed using random  
832 hexamers (Roche) and Superscript III Reverse Transcriptase (Invitrogen, #18080044) in the  
833 presence of RNase OUT (Invitrogen, #10777019) or RNasin (Promega, #N2611) under the  
834 following conditions: 25°C for 5 min, then 55°C for 60 min, 95°C for 5 min. Remaining RNA was  
835 hydrolyzed using 1 N NaOH. Quantitative PCR was performed using iQ SYBR Green supermix  
836 (Bio-Rad, #1708880) on the iQ5 Multicolor RealTime PCR Detection System using gene  
837 specific primers indicated in Table S3. Relative change in gene expression compared to PBS  
838 control was determined the  $\Delta\Delta$ CT method (Livak and Schmittgen, 2001).

839

### 840 Quantification and statistical analysis

841 All experiments were done at least in triplicate and quantitative results are reported as the  
842 mean  $\pm$  standard deviation (s.d.). Statistical analysis was performed using GraphPad Prism v6.0  
843 as detailed in the figure legends. Statistical differences in ELISA and qPCR results were  
844 determined by one-way ANOVA followed by multiple comparison's test. Statistical difference in  
845 results comparing suppression of ERK, p38, and JNK signaling by various *V. cholerae* strains  
846 compared to the ACD Active only strain were determined using Student's t-tests.

847

848

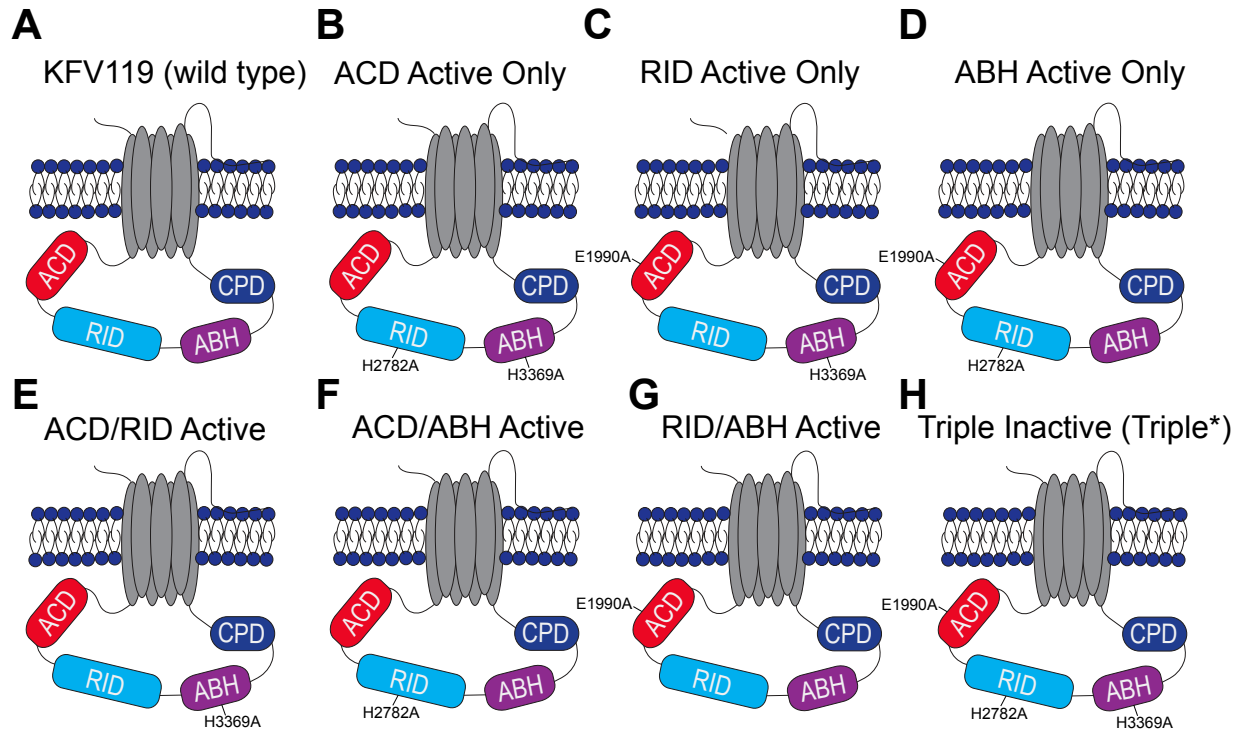

849

850

851 **Figure S1. Schematic of single and double catalytically active MARTX<sub>vc</sub> toxin effector**  
852 **strains and triple inactive MARTX<sub>vc</sub> toxin effector strain.**

853 (A) Wild type toxin. (B) RID Active only strain with RID and ABH catalytically inactive. (C) RID  
854 Active only strain with ACD and ABH catalytically inactive. (D) ABH Active only strain with ACD  
855 and RID catalytically inactive. (E) ACD/RID active strain with only ABH catalytically inactive. (F)  
856 ACD/ABH Active strain with only RID catalytically inactive. (G) RID/ABH Active strain with only  
857 ACD catalytically inactive. (H) Triple inactive strain (Triple\*) with all three effectors catalytically  
858 inactive.

859

860



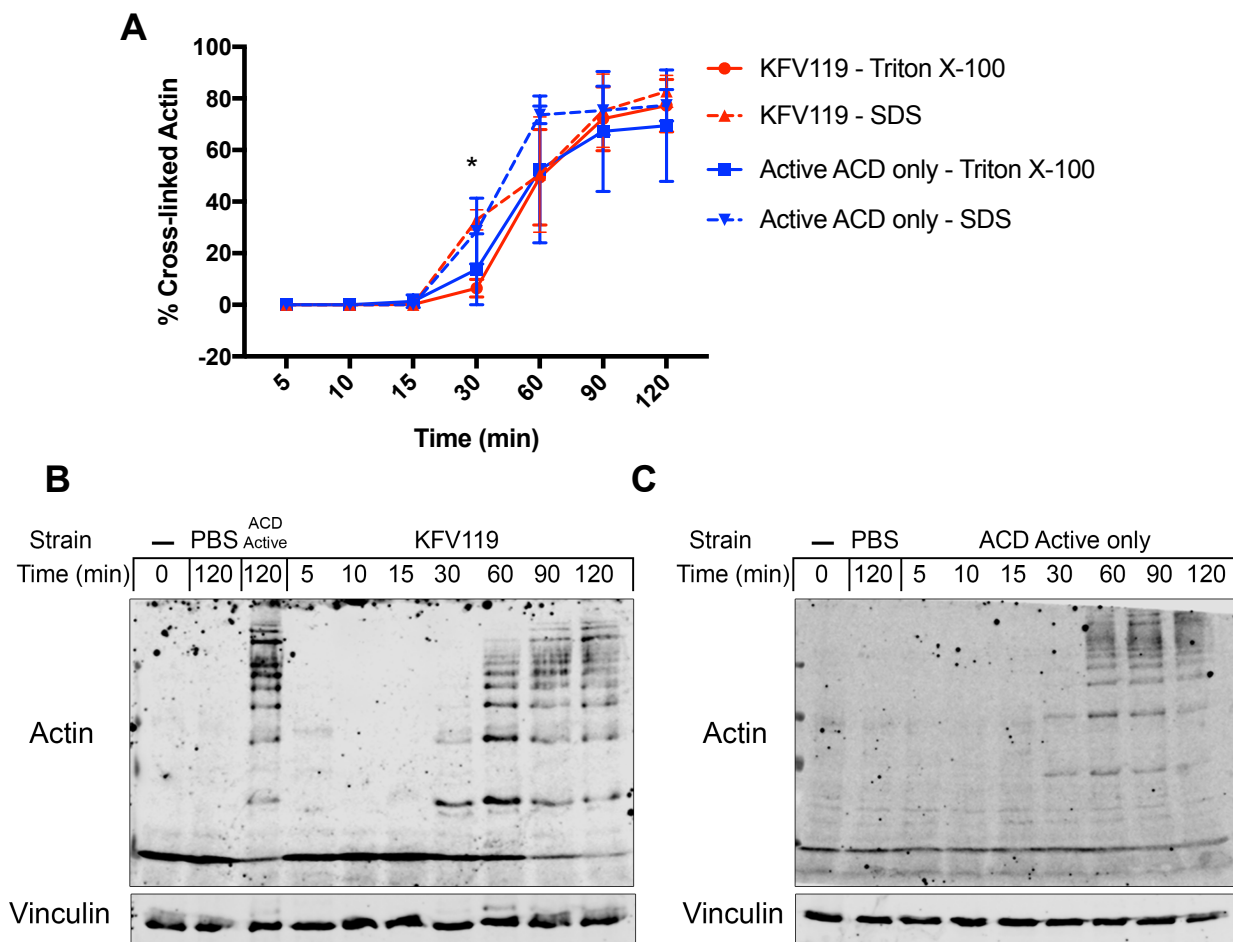

861  
 862 **Figure S2. Cells harvested in Triton X-100 lysis buffer for assessment of MAPK**  
 863 **phosphorylation underestimates the rate of actin cross-linking further supporting**  
 864 **that extensive cross-linking occurs ahead of inflammation.**

865 (A) Quantification of actin cross-linking from T84 cells treated with KfV119 or the ACD  
 866 Active Only strain with washed cells being lysed and collected in Triton X-100 lysis  
 867 buffer followed by centrifugation and protein quantification or by direct resuspension and  
 868 boiling in 2x SDS loading buffer. Data reported as mean  $\pm$  s.d.

869 (B) Representative western blot of actin cross-linking from T84 cells inoculated with  
 870 KfV119 and samples collected in SDS loading buffer.

871 (C) Representative western blot of actin cross-linking form T84 cells inoculated with the  
872 ACD Active only strain and samples collected in SDS loading buffer.  
873 Triton X-100 lysis underestimates actin cross-linking at early time points further  
874 supporting that extensive cross-linking activate the inflammatory response. Specifically,  
875 there is a statistically significant increase in actin cross-linking observed when KFV119  
876 treated cells were lysed using SDS loading buffer compared to Triton X-100 at 30  
877 minutes (\* $p < 0.05$ , Two-way ANOVA with multiple comparisons). However, no significant  
878 difference was observed at any time point between the two methods when cells were  
879 treated with the ACD Active only strain. No significant difference was observed  
880 comparing samples treated with either KFV119 and the ACD Active only strain when  
881 using either method.  
882  
883

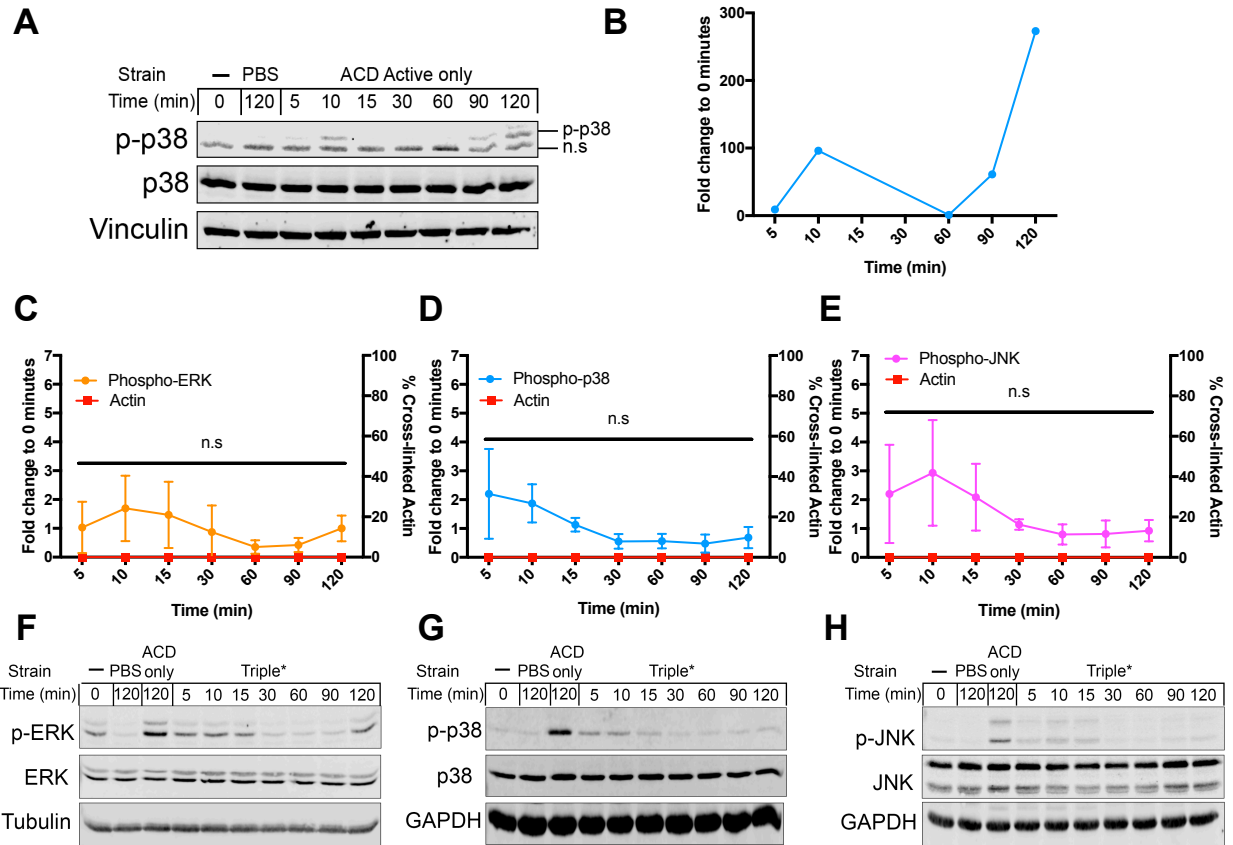

884

885 **Figure S3. MAPK activation over 120 min challenge with the triple inactive (Triple\*)**

886 **MARTX<sub>vc</sub> toxin effector strain.**

887 (A) Western blot analysis of p-38 activation by the ACD only strain 273-fold times higher at 120

888 min compared to the 0 min control. Non-specific bands are indicated as n.s.

889 (B) Quantification of p-38 activation from western blot presented in panel A.

890 (C-E) Fold change of (C) phospho-ERK, (D) phospho-p38, and (E) phospho-JNK compared to 0

891 min control quantified from western blot band densities from T84 cells inoculated with the Triple\*

892 *V. cholerae* strain plotted with quantification of percent actin cross-linked over the two hour

893 incubation.

894 (F-H) Representative western blots of (G) phospho-ERK, (H) phospho-p38, and (I) phospho-

895 JNK activation during 120 min bacterial challenge.

896

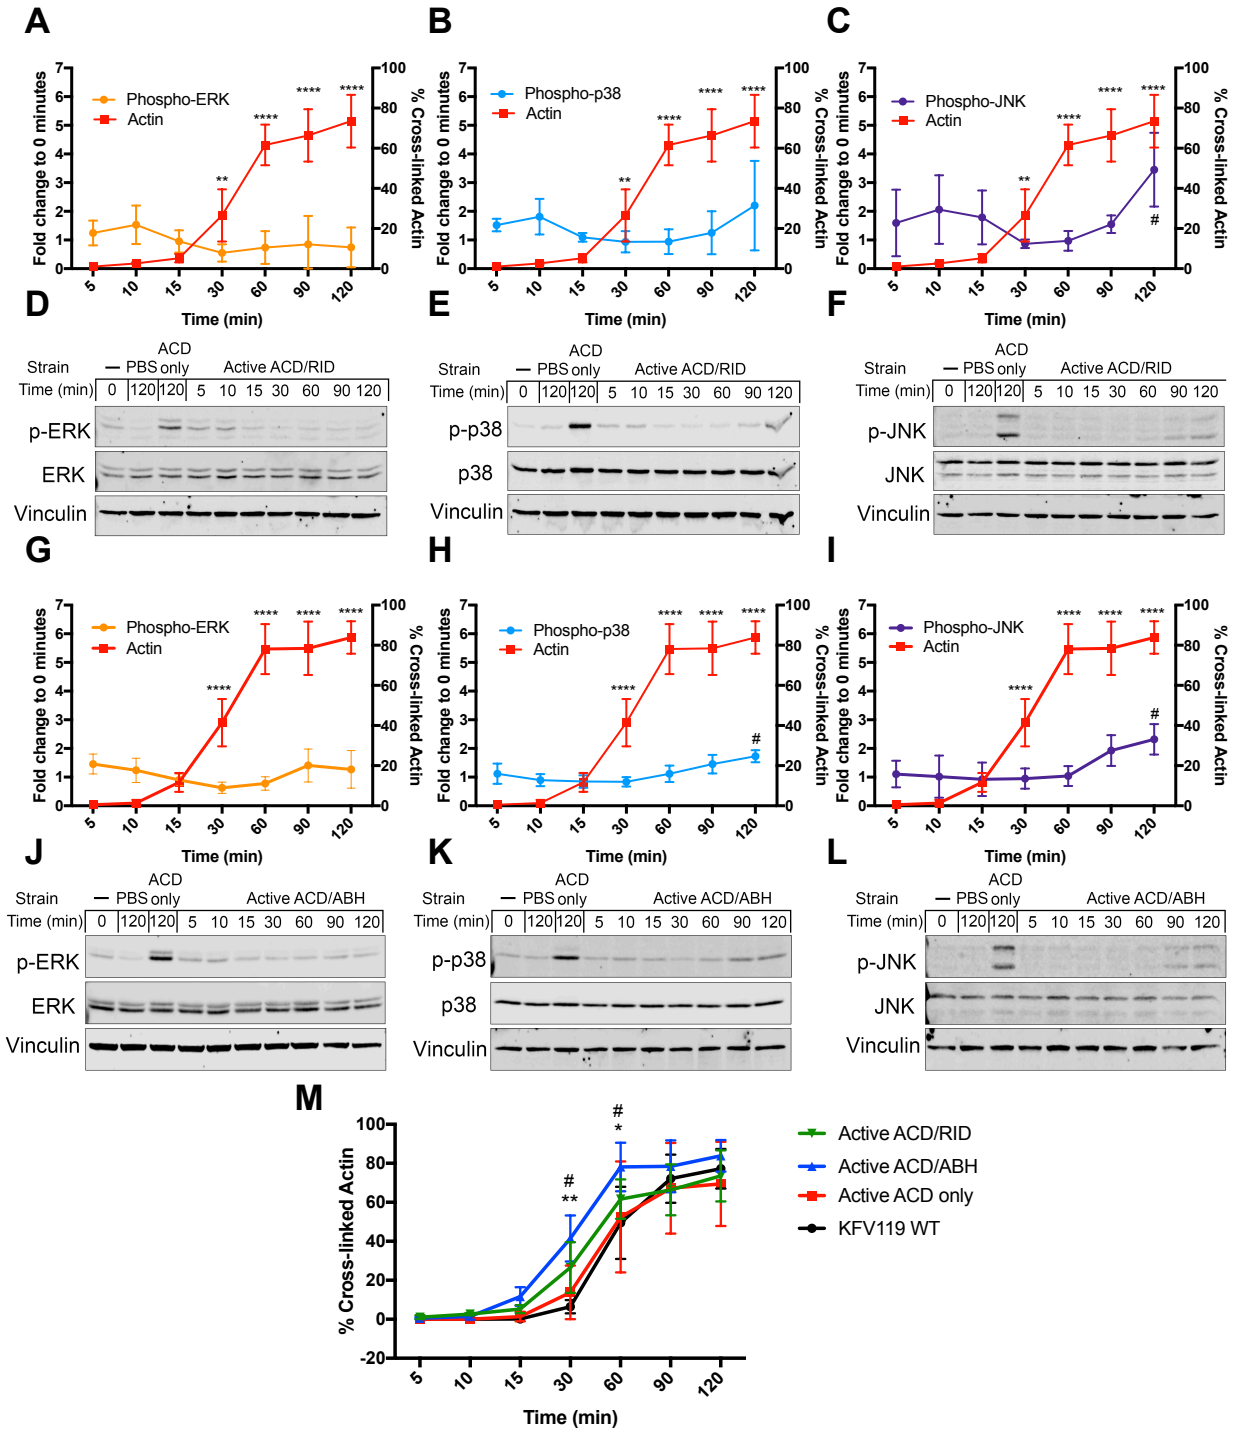

897

898 **Figure S4. RID and ABH block MAPK signaling prior to host detection of sequestration of**

899 **bulk actin without modulating ACD activity.**

900 (A-C) Fold change of (A) phospho-ERK, (B) phospho-p38, and (C) phospho-JNK compared to 0  
901 min control quantified from western blot band densities from T84 cells inoculated with the  
902 ACD/RID active *V. cholerae* strain plotted with quantification of percent actin cross-linked over  
903 the two hour incubation (\*\* $p < 0.01$ , \*\*\*\* $p < 0.0001$ , One-way ANOVA with multiple comparisons  
904 between indicated timepoints and 0% actin cross-linking from 0 min control. #  $p < 0.05$ , One-way  
905 ANOVA with multiple comparisons between phospho-JNK at indicated timepoint and a 0 min  
906 control with a normalized fold change of 1).

907 (D-F) Representative western blots of (D) phospho-ERK, (E) phospho-p38, and (F) phospho-  
908 JNK activation during 120 min bacterial challenge.

909 (G-I) Fold change of (G) phospho-ERK, (H) phospho-p38, and (I) phospho-JNK compared to 0  
910 min control quantified from western blot band densities from T84 cells inoculated with the  
911 ACD/ABH active *V. cholerae* strain plotted with quantification of percent actin cross-linked over  
912 the 120 min incubation. (\*\*\*\* $p < 0.0001$ , One-way ANOVA with multiple comparisons between  
913 indicated timepoints and 0% actin cross-linking from 0 min control. #  $p < 0.05$ , One-way ANOVA  
914 with multiple comparisons between phospho-p38/JNK at indicated timepoints and a 0 min  
915 control with a normalized fold change of 1).

916 (J-L) Representative western blots of (J) phospho-ERK, (K) phospho-p38, and (L) phospho-JNK  
917 activation during 120 min bacterial challenge.

918 (M) Comparison of percent actin cross-linking during 120 min bacterial challenge of ACD  
919 positive *V. cholerae* strains (\*  $p < 0.05$ , \*\*  $p < 0.01$  Two-way ANOVA with multiple comparisons  
920 between KFV119 and Active ACD/ABH, # $p < 0.05$ , Two-way ANOVA with multiple comparisons  
921 between Active ACD only and Active ACD/ABH).

922

923

**Table S1. Bacterial strains and plasmid used in study.**

| Designation               | Relevant Description                                     | Source                                            |
|---------------------------|----------------------------------------------------------|---------------------------------------------------|
| <u><i>E. coli</i></u>     |                                                          |                                                   |
| BL21(DE3)(pMagic)         | Protein overexpression, Km <sup>R</sup>                  | A. Joachimiak<br>(Argonne National<br>Laboratory) |
| DH5αλpir                  | Plasmid cloning                                          | Lab stock                                         |
| SM10λpir                  | Conjugation to <i>V. cholerae</i> , Sm <sup>R</sup>      | Lab stock                                         |
| <u><i>V. cholerae</i></u> |                                                          |                                                   |
| N16961Sm                  | EI Tor O1, Wild-type, Sm <sup>R</sup>                    | (Lin et al., 1999)                                |
| KFV43                     | N16961ΔhapA                                              | (Fullner and<br>Mekalanos, 1999)                  |
| VOV21                     | N16961ΔhlyA                                              | (Olivier et al., 2007)                            |
| CW123                     | N16961ΔrtxA                                              | (Sheahan et al.,<br>2004)                         |
| KFV119                    | N16961ΔhlyAΔhapA                                         | (Dolores et al.,<br>2015)                         |
| JD23                      | KFV119ΔrtxA <sup>ABCD</sup>                              | (Dolores et al.,<br>2015)                         |
| JD1                       | KFV119 rtxA::bla                                         | (Dolores et al.,<br>2015)                         |
| JD20                      | KFV119 acd::bla                                          | (Dolores et al.,<br>2015)                         |
| JD19                      | KFV119 rid::Bla                                          | (Dolores et al.,<br>2015)                         |
| JD21                      | KFV119 rid-H2782A::bla                                   | (Dolores et al.,<br>2015)                         |
| JD2                       | KFV119 abh::bla                                          | (Dolores et al.,<br>2015)                         |
| JD15                      | KFV119 abh-H3369A::bla                                   | (Dolores et al.,<br>2015)                         |
| 2010EL-1786               | Atypical EI Tor O1, Wild-type, Sm <sup>R</sup>           | ATCC #BAA-2163                                    |
| JD16                      | 2010EL-1786ΩpJD22 (2010EL-1786<br>rtxA+)                 | (Dolores and<br>Satchell, 2013)                   |
| PJWV1                     | KFV119 rtxA-E1990A (RID/ABH Active)                      | This Study                                        |
| PJWV2                     | KFV119 rtxA-H2782A (ACD/ABH Active)                      | This Study                                        |
| PJWV3                     | KFV119 rtxA-H3369A (ACD/RID Active)                      | This Study                                        |
| PJWV4                     | KFV119 rtxA-E1990A-H2782A (ABH<br>Active Only)           | This Study                                        |
| PJWV5                     | KFV119 rtxA-E1990A-H3369A (RID Active<br>Only)           | This Study                                        |
| PJWV6                     | KFV119 rtxA-H2782A-H3369A (ACD<br>Active Only)           | This Study                                        |
| PJWV7                     | KFV119 rtxA-E1990A-H2782A-H3369A<br>(Triple*)            | This Study                                        |
| <u>Plasmids</u>           |                                                          |                                                   |
| pTCO24                    | Overexpression of LF <sub>N</sub> -ACD, Amp <sup>R</sup> | (Cordero et al.,<br>2006)                         |

|        |                                                                                                                                 |                              |
|--------|---------------------------------------------------------------------------------------------------------------------------------|------------------------------|
| pKS119 | Overexpression of LF <sub>N</sub> -RID, Amp <sup>R</sup>                                                                        | (Sheahan and Satchell, 2007) |
| pSA129 | <i>sacB</i> counterselection cloning vector<br>pWM91 with <i>rtxA</i> with fragment of H2782A<br>codon change, Amp <sup>R</sup> | (Ahrens et al., 2013)        |
| pDS132 | <i>sacB</i> counterselection cloning vector,<br>oriR6K, oriT, Chl <sup>R</sup>                                                  | (Philippe et al., 2004)      |
| pP JW4 | pDS132 with fragment of <i>rtxA</i> with E1990A<br>codon change, Chl <sup>R</sup>                                               | This Study                   |
| pP JW5 | pDS132 with fragment of <i>rtxA</i> with<br>H3369A codon change, Chl <sup>R</sup>                                               | This Study                   |

---

924  
925

926  
927 **Table S2. Sequences of gBlocks used to clone into pDS132 and modify ACD (E1990A)**  
928 **and ABH (H3369A) effector domains of *rtxA* on the *V. cholerae* genome.**

| Mutation   | Sequence (5'-3') (introduce codon changes highlighted)                                                                                                                                                                                                                                                                                                                                                                                                                                                                                                                                                                                                                                                                                                                                                                                                                                                                                                                                                                                                                                                                                                                                  |
|------------|-----------------------------------------------------------------------------------------------------------------------------------------------------------------------------------------------------------------------------------------------------------------------------------------------------------------------------------------------------------------------------------------------------------------------------------------------------------------------------------------------------------------------------------------------------------------------------------------------------------------------------------------------------------------------------------------------------------------------------------------------------------------------------------------------------------------------------------------------------------------------------------------------------------------------------------------------------------------------------------------------------------------------------------------------------------------------------------------------------------------------------------------------------------------------------------------|
| ACD E1990A | CCCAAGCTTCTTCTAGAGGTACCGCATGCCAAGCACAAGCCGATGCTC<br>AAGGTGCTAAACAAAACGAAGGTGATCGTCCTGATCGTCAAGGCGTGA<br>CTGGTAGTGGCCTTTTCGGGTAATGCTCATAGTGTGGAAGGCGCTGGCG<br>AAACAGACAGTCATGTCAACACCGACAGCCAAACCAACGCCGATGGCC<br>GATTCAGTGAAGGTTTAAACCGAACAAGAGCAAGAAGCGCTAGAAGGTG<br>CGACCAACGCAGTGAACCGTTTGCAAATTAACGCAGGTATTTCGAGCGA<br>AAAACAGCGTTAGCAGTATGACTTCTATGTTCTCTGAAACAAATAGCAAG<br>AGCATTGTTGTTCCCTACCAAAGTCTCGCCTGAACCAGAGCGCCAAGAAG<br>TGACTCGTAGAGACGTCCGTATCTCAGGGGTGAACCTCGAAAGTCTAA<br>GTGCGGTACAGGGAAGTCAACCAACGGGTCAACTGGCTTCGAAAAGTG<br>TCCCCGGATTTAAAAGCCATTTGCGATCGACATCAATTGGTATAGCAA<br>TGAGTTATCCGGTCTGGTGGTGGTTTTACCGAAAACTCAGCGCAGACT<br>TTTGGCTATGTGCATGATTCACAAGGTAACCCATTGTTTCATGCTAACCAA<br>GGATATGAATCAAGGTGGTTATAGCAACCCAGTGGGTATCAATGATATT<br>CAAGGGGTGAACAACCTGGCAGACGCATACGATTGAACTGGTTACATATC<br>CTAGTGAAATCAGTGATACAGCAGCGTTGAAAGTCGTAAGAGGCAAT<br>GCTATGGCTTGCGAAAGAGTTTACCGATCATATCAATCAGTCTAACCCAC<br>CAAAGCTTACCTCATTTAGTGAGTGATGACGGTCTGTTTCACTCTGGTTAT<br>ATCGAACTCTAAGCATCTTATTGCGGCGGGTAACGGAACCTCTATTGAT<br>GCACAAGGCAAGACCATAGGAATGACCCCTAGTGGCCAACAAGCAACA<br>ATGGCGATCAGTGCGAAAGAATTTGGTACAAGCTCGTCGCCGGAAGTC<br>AGACTGCTGCATGCGATATCGAGCTCTCCCGGG |
| ABH H3369A | CCCAAGCTTCTTCTAGAGGTACCGCATGCAATCACTACCAGAAGCAAGG<br>TATCGATATGCTCGCAGTCAACCTGCGTGGCTATGGTGAAAGCGACGG<br>TGGACCAAGCGAAAAAGGCTTGTACCAAGATGCTCGCACCATGTTCAAC<br>TACCTAGTGAATGATAAGGGTATTGACCCAAGCAACATCATCATTACAG<br>GCTACTCAATGGGCGGTCCAATTGCCGCAGATTTAGCACGTTATGCCG<br>CGCAAACGGCCAAGCGGTGTCTGGCTTATTGCTTGACCGTCCTATGC<br>CAAGCATGACCAAAGCAATCACCGCTCACGAAGTGCGGAATCCAGCGG<br>GCATTGTGGGGGCTATCGCGAAAGCGGTTAACGGCCAGTTCTCTGTAG<br>AGAAAAATCTCGAAGGTTTGCCAAAAGAGACATCCATTCTGCTGTTGAC<br>CGATAACGAAGGTTTGGGTAACGAAGGTGAGAACTTCGTACCAAACCTC<br>ACTGCCTCTGGTTACAACGTCACCTGGCGAGCAGACATTCTATGGTGTG<br>AAGCAAGCAACCGTTTGATGAGTCAATATGCGGATCAAATTGTCTCCGG<br>TTTGTCCAGCAGTGCAAGTGTAGATGAAGACCTAGATCAACAAGGGTTG<br>GATACCACATCAACCAAGGATCAAGGTATCTCAAATAAGAATGATCATCT<br>GCAGGTGGTGGATAGTAAAGAAGCATTAGCGGATGGAAAAATACTCCAT<br>AATCAAAATGTTAATAGCTGGGGCCCGATTACGGTTACACCAACGACAG<br>ATGGTGGTGAAACCCGCTTCGACGGTCAAATCATCGTTCAAATGGAAAA<br>CGACCCGGTAGTAGCAAAGCGGCAGCCAATTTAGCAGGTAAACATGC<br>TGAAAGCAGTGTGGTGGTGCAGCTCGATTAGACGGCAACTATCGCGT<br>GGTGTATGGCGATCCGTCAAACCTGGATGGAAAGCTACGTTGGCAGTT<br>GGTGGGGCATGGTCGCGACCACTCAGAACTAACAATACTCGCTTAAG<br>TGTTACAGTGCCGCATGCGATATCGAGCTCTCCCGGG      |



929 **Table S3 Primers used in study.**

| <b>Primer</b>  | <b>Sequence</b>                     | <b>Function</b>       |
|----------------|-------------------------------------|-----------------------|
| IL-8_5'        | AGCACTCCTTGGCAAAACTG                | CXCL8 qPCR            |
| IL-8_3'        | CAAGAGCCAGGAAGAAACCA                | CXCL8 qPCR            |
| qTNF_5'        | GCCAGAGGGCTGATTAGAGA                | TNF qPCR              |
| qTNF_3'        | TCAGCCTCTTCTCCTTCCTG                | TNF qPCR              |
| qJUN_5'        | GTCCTTCTTCTCTTGCGTGG                | JUN qPCR              |
| qJUN_3'        | GGAGACAAGTGGCAGAGTCC                | JUN qPCR              |
| qFOS_5'        | GGGGCAAGGTGGAACAGTTAT               | FOS qPCR              |
| qFOS_3'        | CCGCTTGGAGTGTATCAGTCA               | FOS qPCR              |
| qCXCL3_5'      | CGCCCAAACCGAAGTCATAG                | CXCL3 qPCR            |
| qCXCL3_3'      | GCTCCCCTTGTTCAGTATCTTTT             | CXCL3 qPCR            |
| qEGR1_5'       | AAAGCGGCCAGTATAGGTGA                | EGR1 qPCR             |
| qEGR1_3'       | AGCCCTACGAGCACCTGAC                 | EGR1 qPCR             |
| GAPDH_2_5' FWD | TTGAGGTCAATGAAGGGGTC                | GAPDH qPCR            |
| GAPDH_2_3' REV | GAAGGTGAAGGTCGGAGTCA                | GAPDH qPCR            |
| ACDVc_cat_FWD  | GCACAAGCCGATGCTCAAGGTGCTAAACAAAAC   | <i>acd</i> E1990A PCR |
| ACDVc_cat_REV  | GTCTGACTTCCGGCGACGAGCTTGTACCAAATT   | <i>acd</i> E1990A PCR |
| RIDVc_cat_FWD  | GGCAAAGGTAATCTTGCCAATATCGATCTGCTAGG | <i>rid</i> H2782A PCR |
| RIDVc_cat_REV  | CTCGATAAAGCGTTTCAGCTTAATGTCGCCATC   | <i>rid</i> H2782A PCR |
| ABHVc_cat_FWD  | CACTACCAGAAGCAAGGTATCGATATGTCGCAG   | <i>abh</i> H3369A PCR |
| ABHVc_cat_REV  | CCACTTAAGCGAGTATTGTTAGTTTCTGAG      | <i>abh</i> H3369A PCR |

930
